# Supplementary material
Source: Royal Society of Chemistry journal article supplement (doi:10.1039/d6ce00205f)
Supplement: d6ce00205f1.pdf [file d6ce00205f1.pdf]

# **Complete Structural and Electronic Comparison of Chiral and Racemic Ketoheptoses: Hydrogen-Bond Network Topology and Interaction Strength Distribution**

**Tomoko Takashita,<sup>\*a</sup> Ryunosuke Takata,<sup>a</sup> Mizuki Aoe,<sup>a</sup> Kei Takeshita,<sup>b</sup> Tomohiko Ishii<sup>a</sup>**

Supplementary information

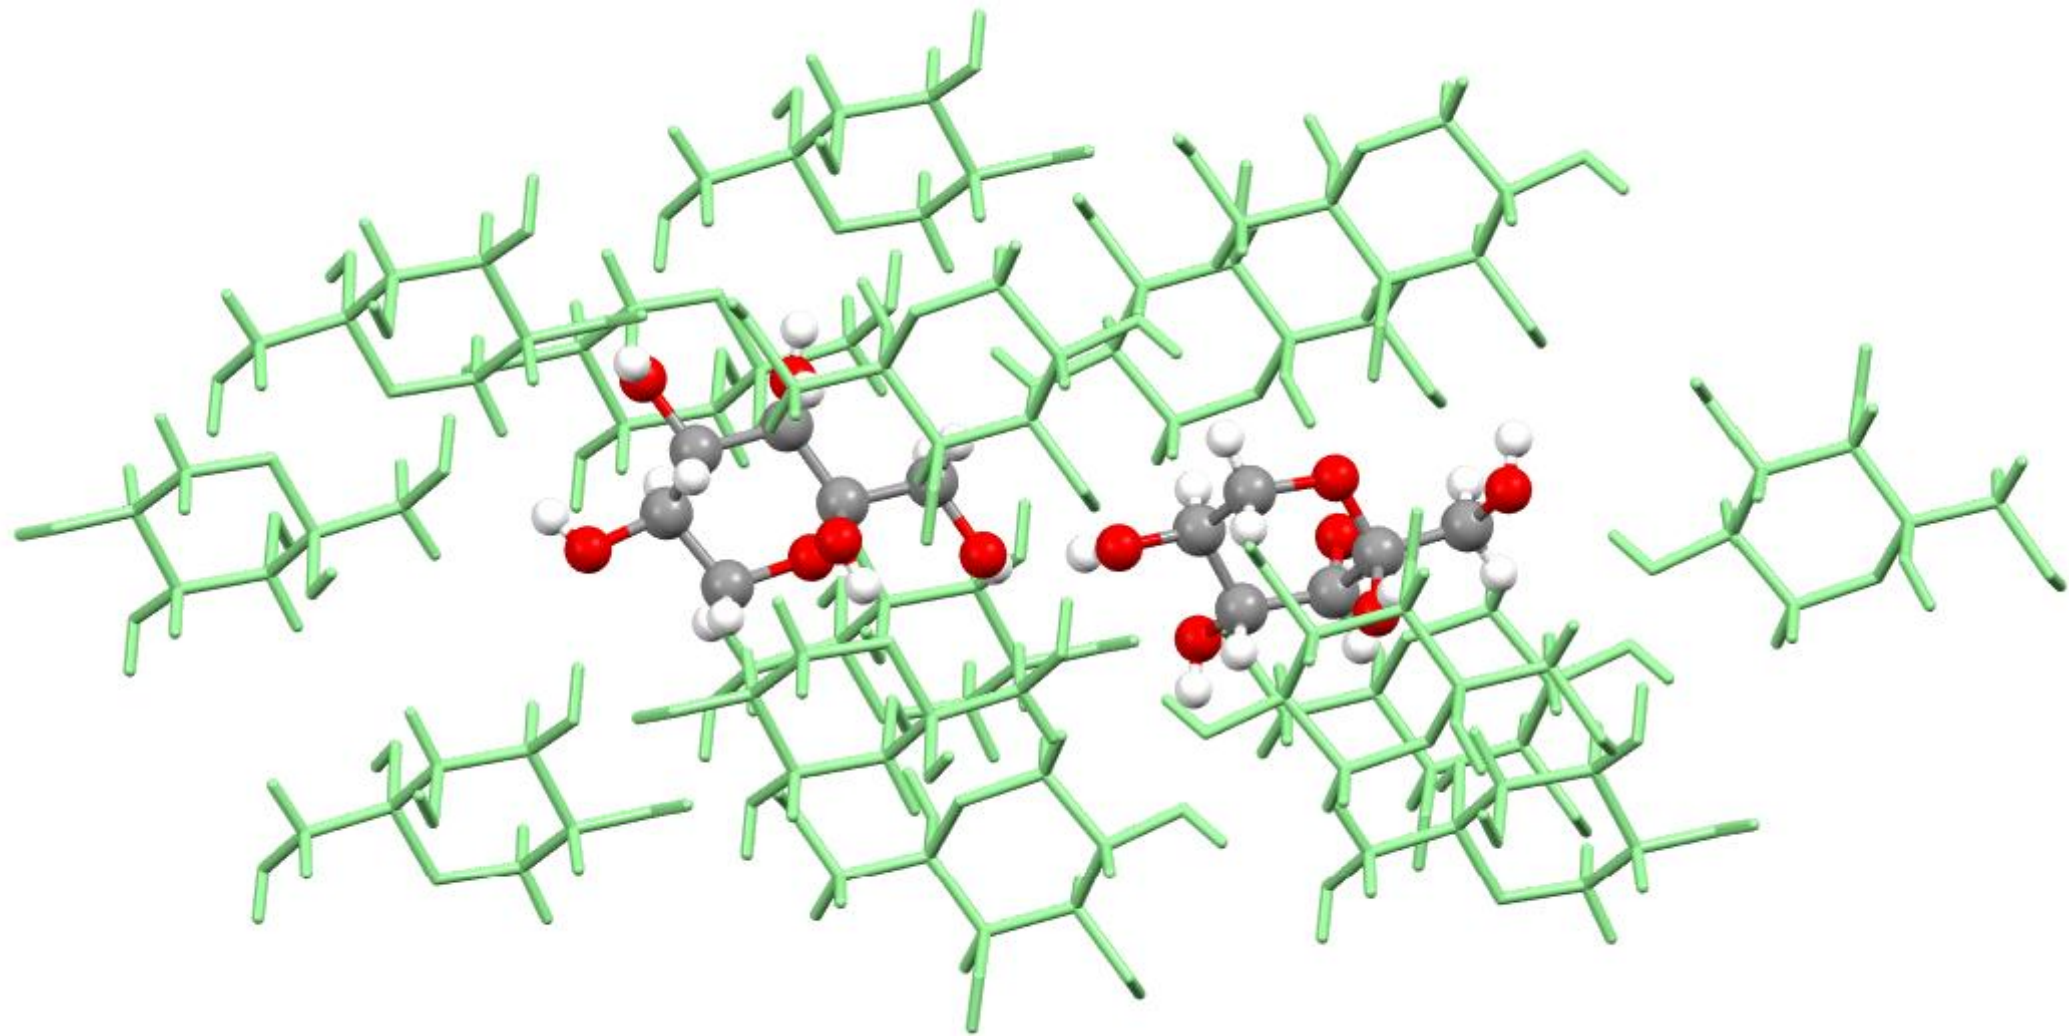

Fig. S1 Computational model of D,L-tagatose: two central molecules (one D-form and one L-form) surrounded by 15 neighboring molecules (light green).

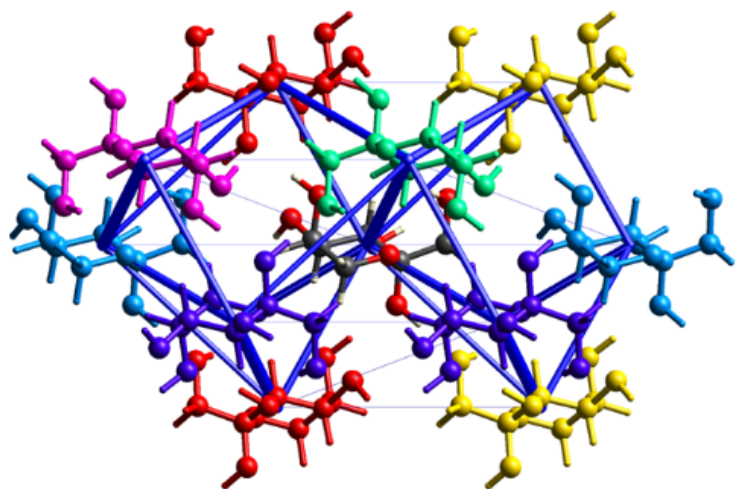

|  | N | Symop               | R    | Electron Density | E_ele | E_pol | E_dis | E_rep | E_tot |
|--|---|---------------------|------|------------------|-------|-------|-------|-------|-------|
|  | 2 | $-x+1/2, -y, z+1/2$ | 5.74 | HF/3-21G         | -48.9 | -13.9 | -24.5 | 45.8  | -43.8 |
|  | 2 | $-x+1/2, -y, z+1/2$ | 7.26 | HF/3-21G         | -55.8 | -16.3 | -10.3 | 52.0  | -34.6 |
|  | 2 | $x+1/2, -y+1/2, -z$ | 6.3  | HF/3-21G         | -42.1 | -11.2 | -20.7 | 21.9  | -51.1 |
|  | 2 | $-x, y+1/2, -z+1/2$ | 5.32 | HF/3-21G         | -76.9 | -21.9 | -33.6 | 58.5  | -75.5 |
|  | 2 | $x, y, z$           | 8.08 | HF/3-21G         | 3.7   | -0.9  | -8.4  | 2.3   | -2.5  |
|  | 2 | $x+1/2, -y+1/2, -z$ | 6.93 | HF/3-21G         | -2.9  | -1.5  | -13.6 | 6.5   | -11.0 |
|  | 2 | $-x, y+1/2, -z+1/2$ | 8.59 | HF/3-21G         | 1.7   | -0.8  | -4.6  | 0.6   | -2.4  |

Fig. S2

Energy framework and intermolecular interaction analysis for D-fructose.

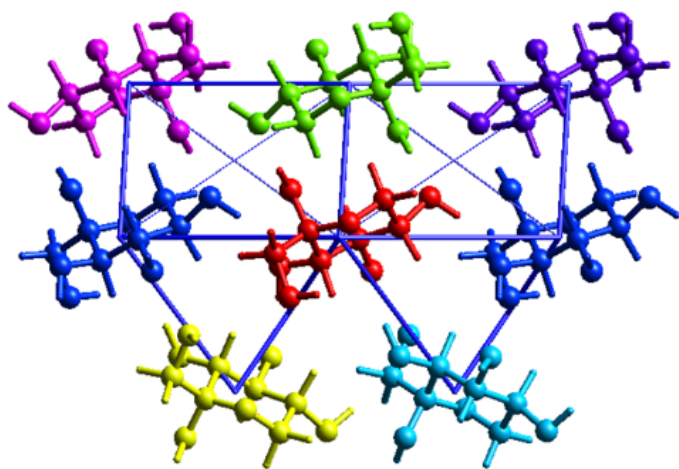

|  | N | Symop             | R    | Electron Density | E_ele | E_pol | E_dis | E_rep | E_tot |
|--|---|-------------------|------|------------------|-------|-------|-------|-------|-------|
|  | 2 | x, y, z           | 6.29 | HF/3-21G         | -42.6 | -12.0 | -24.3 | 34.1  | -45.5 |
|  | 1 | -                 | 5.37 | HF/3-21G         | -38.2 | -14.5 | -27.1 | 36.9  | -42.9 |
|  | 1 | -                 | 8.42 | HF/3-21G         | -42.6 | -12.0 | -24.3 | 34.1  | -45.5 |
|  | 2 | -x+1/2, y+1/2, -z | 5.53 | HF/3-21G         | -49.6 | -14.4 | -26.5 | 46.8  | -45.8 |
|  | 2 | x+1/2, -y+1/2, z  | 6.89 | HF/3-21G         | -41.1 | -12.5 | -18.0 | 29.5  | -42.3 |
|  | 1 | -                 | 6.24 | HF/3-21G         | -41.1 | -12.5 | -18.0 | 29.5  | -42.3 |
|  | 1 | -                 | 6.64 | HF/3-21G         | 0.5   | -0.9  | -11.8 | 4.7   | -7.0  |
|  | 2 | x+1/2, -y+1/2, z  | 7.43 | HF/3-21G         | 0.5   | -0.9  | -11.8 | 4.7   | -7.0  |
|  | 1 | -x, -y, -z        | 8.18 | HF/3-21G         | -3.8  | -1.1  | -7.5  | 2.1   | -9.7  |
|  | 1 | -x, -y, -z        | 7.57 | HF/3-21G         | -11.8 | -1.0  | -4.0  | 0.2   | -16.2 |
|  | 1 | -                 | 8.12 | HF/3-21G         | -42.6 | -12.0 | -24.3 | 34.1  | -45.5 |

Fig. S3

Energy framework and intermolecular interaction analysis for D,L-fructose.

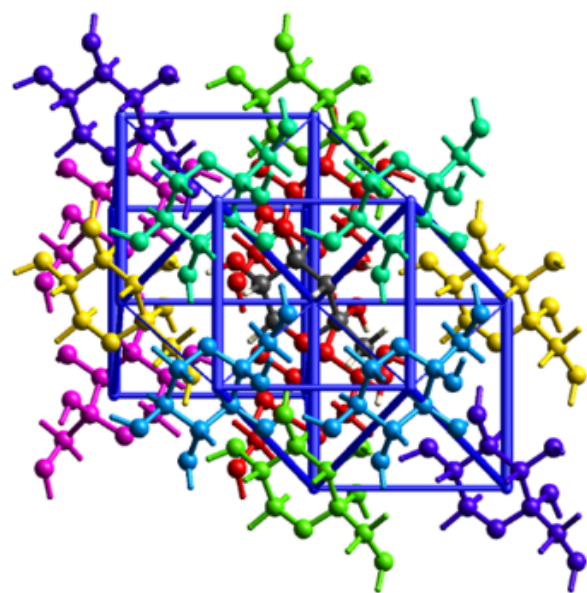

|  | N | Symop               | R    | Electron Density | E_ele | E_pol | E_dis | E_rep | E_tot |
|--|---|---------------------|------|------------------|-------|-------|-------|-------|-------|
|  | 2 | $-x+1/2, -y, z+1/2$ | 5.39 | HF/3-21G         | -37.5 | -9.8  | -25.1 | 34.3  | -39.4 |
|  | 2 | $x, y, z$           | 6.54 | HF/3-21G         | -35.4 | -12.4 | -23.2 | 29.0  | -41.5 |
|  | 2 | $x, y, z$           | 6.31 | HF/3-21G         | -84.9 | -23.8 | -23.1 | 58.6  | -75.3 |
|  | 2 | $x+1/2, -y+1/2, -z$ | 6.56 | HF/3-21G         | -62.4 | -19.1 | -15.1 | 46.0  | -52.3 |
|  | 2 | $x+1/2, -y+1/2, -z$ | 6.49 | HF/3-21G         | -5.6  | -1.6  | -12.3 | 3.1   | -15.3 |
|  | 2 | $x, y, z$           | 9.09 | HF/3-21G         | 5.2   | -1.6  | -6.6  | 1.7   | -0.3  |
|  | 2 | $-x+1/2, -y, z+1/2$ | 8.77 | HF/3-21G         | -4.1  | -0.9  | -4.9  | 1.4   | -7.9  |

Fig. S4

Energy framework and intermolecular interaction analysis for L-sorbose.

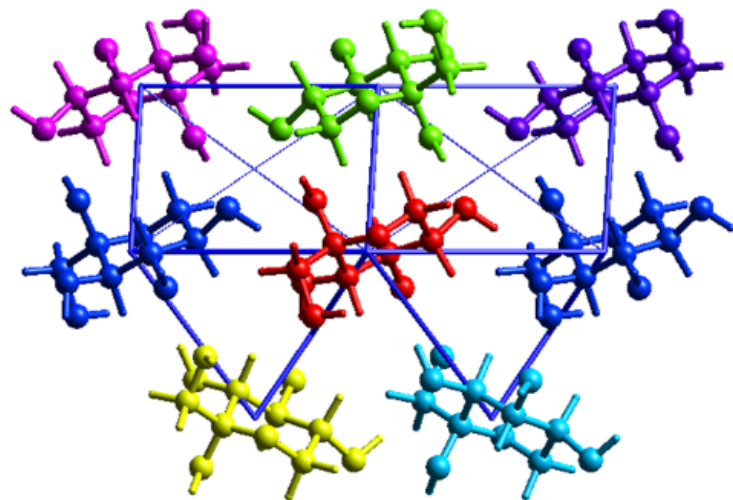

|  | N | Symop               | R    | Electron Density | E_ele | E_pol | E_dis | E_rep | E_tot |
|--|---|---------------------|------|------------------|-------|-------|-------|-------|-------|
|  | 2 | x, y, z             | 6.29 | HF/3-21G         | -42.6 | -12.0 | -24.3 | 34.1  | -45.5 |
|  | 1 | -                   | 5.37 | HF/3-21G         | -38.2 | -14.5 | -27.1 | 36.9  | -42.9 |
|  | 1 | -                   | 8.42 | HF/3-21G         | -42.6 | -12.0 | -24.3 | 34.1  | -45.5 |
|  | 2 | $-x+1/2, y+1/2, -z$ | 5.53 | HF/3-21G         | -49.6 | -14.4 | -26.5 | 46.8  | -45.8 |
|  | 2 | $x+1/2, -y+1/2, z$  | 6.89 | HF/3-21G         | -41.1 | -12.5 | -18.0 | 29.5  | -42.3 |
|  | 1 | -                   | 6.24 | HF/3-21G         | -41.1 | -12.5 | -18.0 | 29.5  | -42.3 |
|  | 1 | -                   | 6.64 | HF/3-21G         | 0.5   | -0.9  | -11.8 | 4.7   | -7.0  |
|  | 2 | $x+1/2, -y+1/2, z$  | 7.43 | HF/3-21G         | 0.5   | -0.9  | -11.8 | 4.7   | -7.0  |
|  | 1 | $-x, -y, -z$        | 8.18 | HF/3-21G         | -3.8  | -1.1  | -7.5  | 2.1   | -9.7  |
|  | 1 | $-x, -y, -z$        | 7.57 | HF/3-21G         | -11.8 | -1.0  | -4.0  | 0.2   | -16.2 |
|  | 1 | -                   | 8.12 | HF/3-21G         | -42.6 | -12.0 | -24.3 | 34.1  | -45.5 |

Fig. S5

Energy framework and intermolecular interaction analysis for D,L-sorbose.

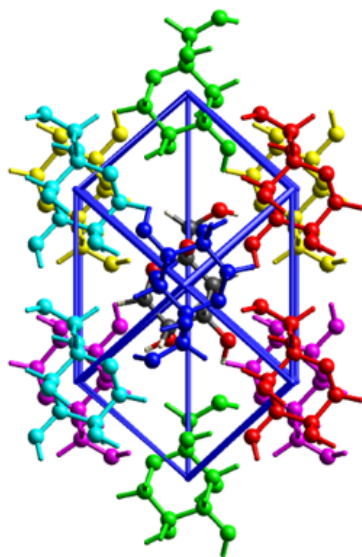

|  | N | Symop               | R    | Electron Density | E_ele | E_pol | E_dis | E_rep | E_tot |
|--|---|---------------------|------|------------------|-------|-------|-------|-------|-------|
|  | 2 | $-x+1/2, -y, z+1/2$ | 6.26 | HF/3-21G         | -58.1 | -16.9 | -19.3 | 42.2  | -53.3 |
|  | 2 | $x+1/2, -y+1/2, -z$ | 6.38 | HF/3-21G         | -42.3 | -12.5 | -18.8 | 36.3  | -38.8 |
|  | 2 | $x, y, z$           | 7.75 | HF/3-21G         | -49.3 | -14.7 | -14.0 | 40.9  | -39.2 |
|  | 2 | $-x+1/2, -y, z+1/2$ | 6.72 | HF/3-21G         | -9.2  | -5.4  | -17.1 | 8.7   | -21.2 |
|  | 2 | $-x, y+1/2, -z+1/2$ | 5.60 | HF/3-21G         | -3.5  | -3.4  | -19.0 | 8.2   | -16.2 |
|  | 2 | $x+1/2, -y+1/2, -z$ | 6.48 | HF/3-21G         | -50.2 | -15.1 | -16.8 | 26.8  | -54.4 |

Fig. S6

Energy framework and intermolecular interaction analysis for D-psicose.

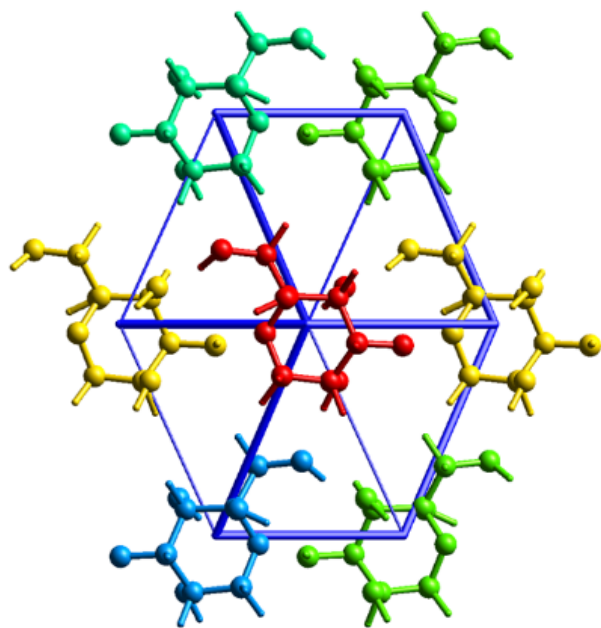

|  | N | Symop                   | R    | Electron Density | E_ele | E_pol | E_dis | E_rep | E_tot |
|--|---|-------------------------|------|------------------|-------|-------|-------|-------|-------|
|  | 2 | x, y, z                 | 5.36 | HF/3-21G         | -12.4 | -6.0  | -22.5 | 18.9  | -21.6 |
|  | 2 | x+1/2, -y+1/2, z        | 6.33 | HF/3-21G         | -56.1 | -17.9 | -20.1 | 44.8  | -50.6 |
|  | 2 | -x, -y, z+1/2           | 6.91 | HF/3-21G         | -6.9  | -2.7  | -13.0 | 4.7   | -16.7 |
|  | 2 | -x+1/2, y+1/2,<br>z+1/2 | 7.45 | HF/3-21G         | -56.9 | -17.4 | -12.7 | 40.0  | -48.2 |
|  | 2 | -x+1/2, y+1/2,<br>z+1/2 | 7.45 | HF/3-21G         | 0.1   | -1.6  | -10.2 | 3.8   | -7.0  |
|  | 2 | x+1/2, -y+1/2, z        | 6.15 | HF/3-21G         | -65.7 | -17.2 | -20.5 | 58.4  | -49.2 |
|  | 1 | -x, -y, z+1/2           | 8.61 | HF/3-21G         | -6.6  | -0.7  | -1.8  | 0.0   | -8.7  |

Fig. S7

Energy framework and intermolecular interaction analysis for D,L-psicose.

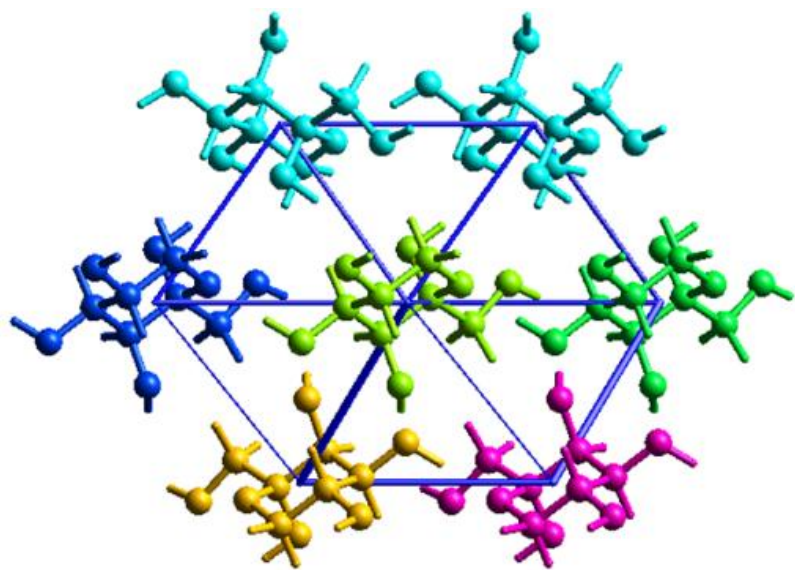

|  | N | Symop               | R    | Electron Density | E_ele | E_pol | E_dis | E_rep | E_tot |
|--|---|---------------------|------|------------------|-------|-------|-------|-------|-------|
|  | 2 | $x+1/2, -y+1/2, -z$ | 5.42 | HF/3-21G         | -33.0 | -8.9  | -28.7 | 33.6  | -38.1 |
|  | 2 | $-x, y+1/2, -z+1/2$ | 6.05 | HF/3-21G         | -63.9 | -23.1 | -22.9 | 51.1  | -59.2 |
|  | 2 | $x, y, z$           | 6.50 | HF/3-21G         | -45.8 | -12.2 | -24.6 | 41.8  | -42.8 |
|  | 2 | $x, y, z$           | 6.22 | HF/3-21G         | -44.5 | -15.2 | -23.0 | 42.2  | -41.7 |
|  | 2 | $x+1/2, -y+1/2, -z$ | 8.81 | HF/3-21G         | -3.6  | -0.6  | -3.4  | 0.4   | -6.7  |
|  | 2 | $x, y, z$           | 9.00 | HF/3-21G         | -35.7 | -8.8  | -7.7  | 19.7  | -33.0 |
|  | 2 | $x+1/2, -y+1/2, -z$ | 8.10 | HF/3-21G         | 1.5   | -0.3  | -3.3  | 0.1   | -1.5  |
|  | 2 | $-x, y+1/2, -z+1/2$ | 6.60 | HF/3-21G         | -5.6  | -4.2  | -12.0 | 3.8   | -16.2 |

Fig. S8

Energy framework and intermolecular interaction analysis for D-tagatose.

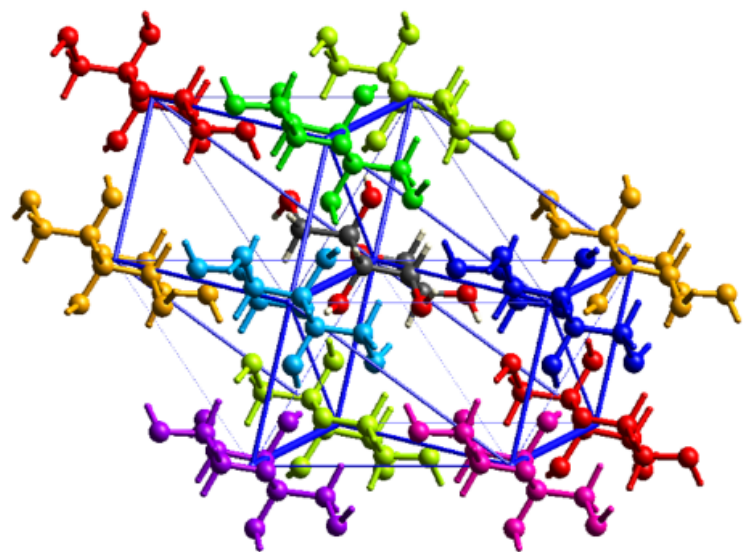

|  | N | Symop               | R    | Electron Density | E_ele | E_pol | E_dis | E_rep | E_tot |
|--|---|---------------------|------|------------------|-------|-------|-------|-------|-------|
|  | 2 | $x, -y+1/2, z+1/2$  | 8.65 | HF/3-21G         | -47.0 | -13.1 | -9.4  | 42.7  | -30.2 |
|  | 2 | $x, y, z$           | 8.11 | HF/3-21G         | -4.6  | -1.4  | -6.1  | 1.7   | -9.7  |
|  | 2 | $x, -y+1/2, z+1/2$  | 5.32 | HF/3-21G         | -51.0 | -14.4 | -22.2 | 42.8  | -46.7 |
|  | 1 | $-x, -y, -z$        | 5.56 | HF/3-21G         | -22.3 | -5.0  | -22.1 | 15.4  | -33.4 |
|  | 1 | $-x, -y, -z$        | 6.97 | HF/3-21G         | -0.2  | -0.7  | -9.2  | 1.3   | -8.0  |
|  | 2 | $-x, y+1/2, -z+1/2$ | 5.61 | HF/3-21G         | -93.3 | -29.2 | -30.0 | 79.8  | -76.5 |
|  | 2 | $-x, y+1/2, -z+1/2$ | 7.34 | HF/3-21G         | -51.2 | -15.7 | -15.6 | 47.7  | -37.8 |
|  | 1 | $-x, -y, -z$        | 8.43 | HF/3-21G         | -4.7  | -0.3  | -1.6  | 0.0   | -6.4  |
|  | 1 | $-x, -y, -z$        | 8.62 | HF/3-21G         | -0.1  | -0.4  | -3.2  | 0.0   | -3.3  |

**(a)**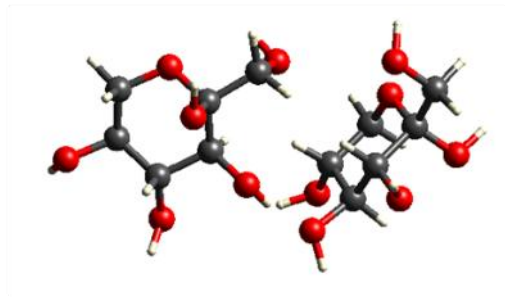**(b)**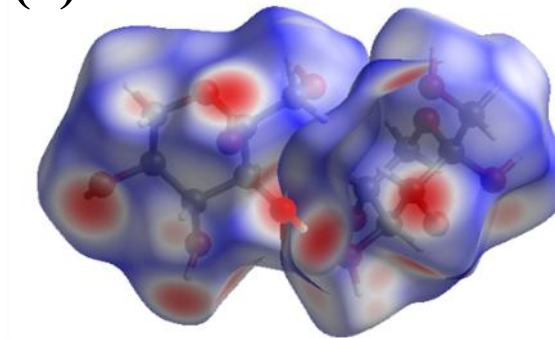**(c)**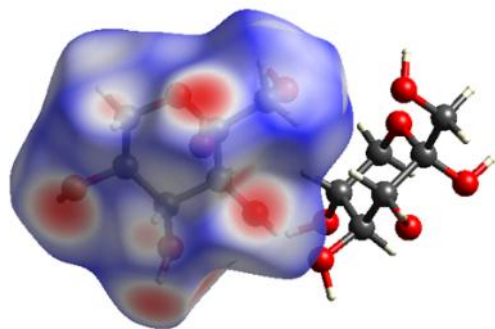**(d)**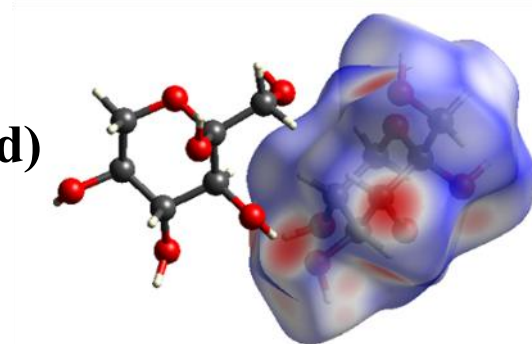

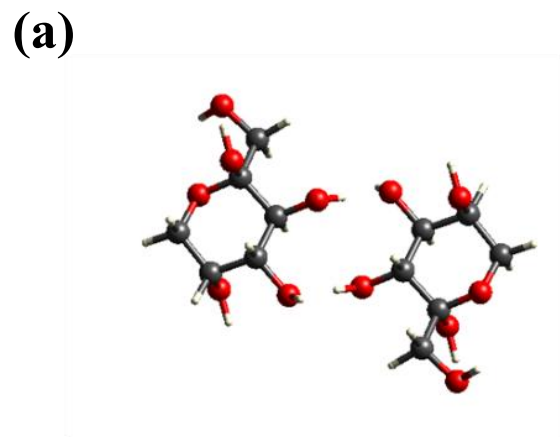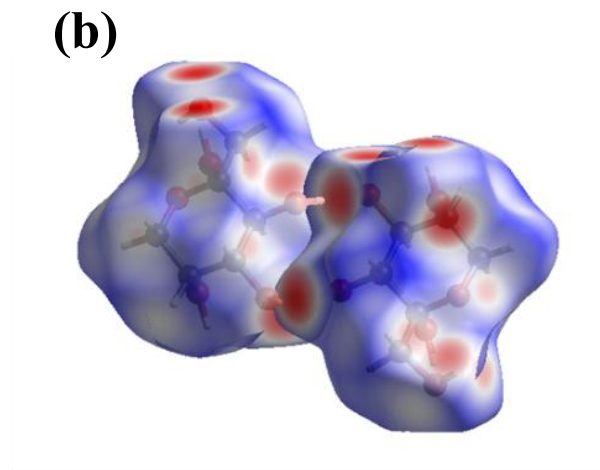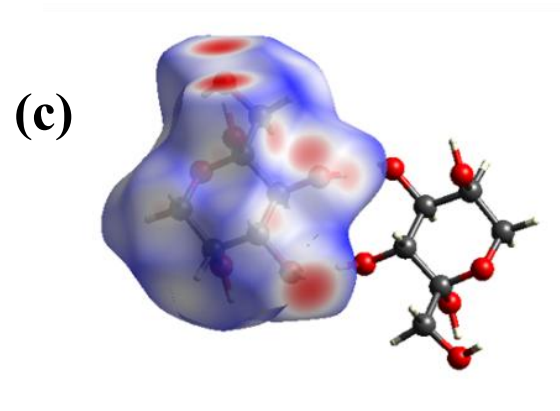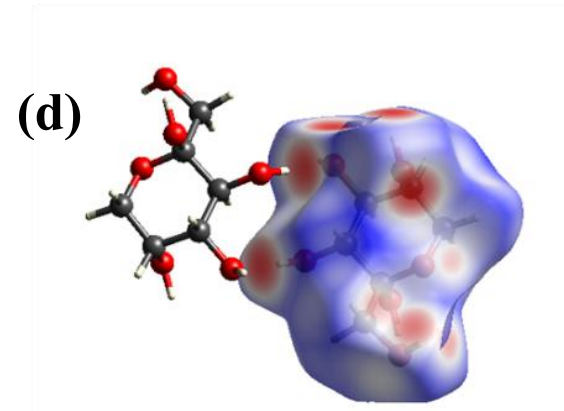

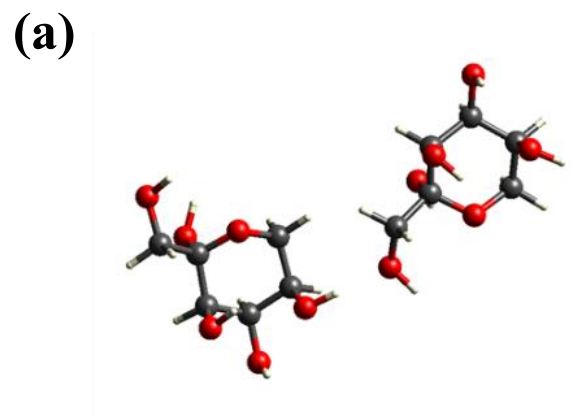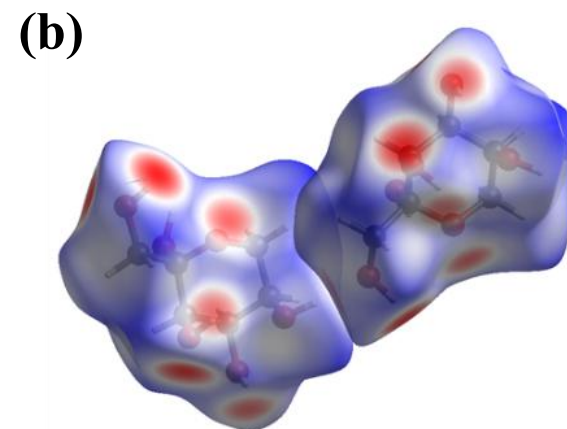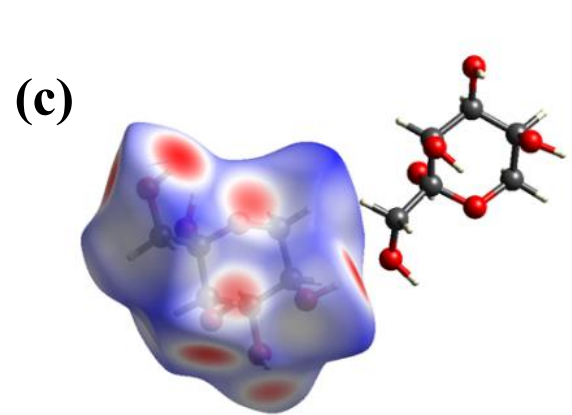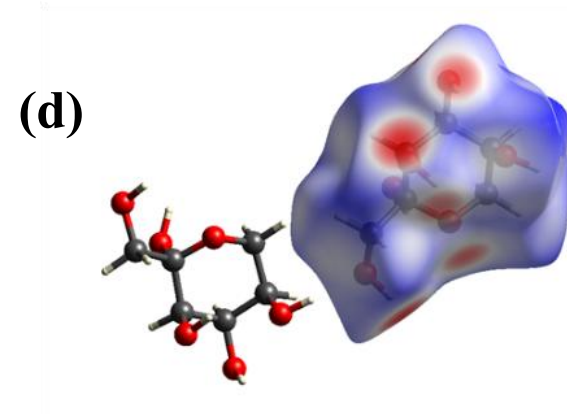

**(a)**

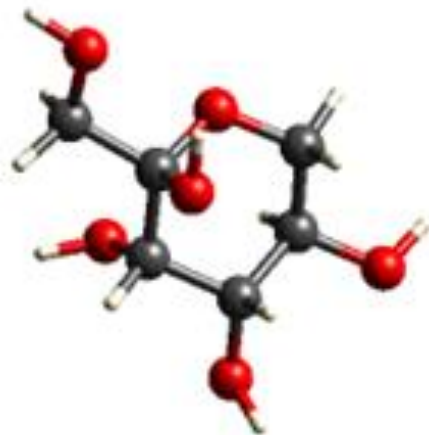

**(b)**

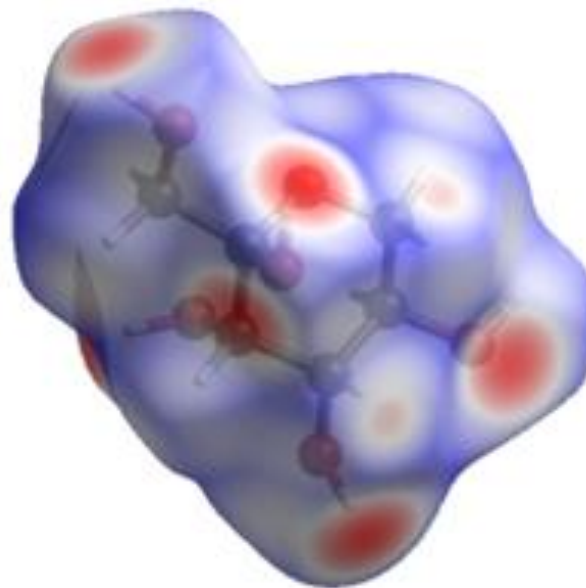

Hirshfeld surface analysis of D-tagatose. (a) Molecular structure of D-tagatose. (b) Hirshfeld surface analysis for the entire D-tagatose crystal.

**(a)**

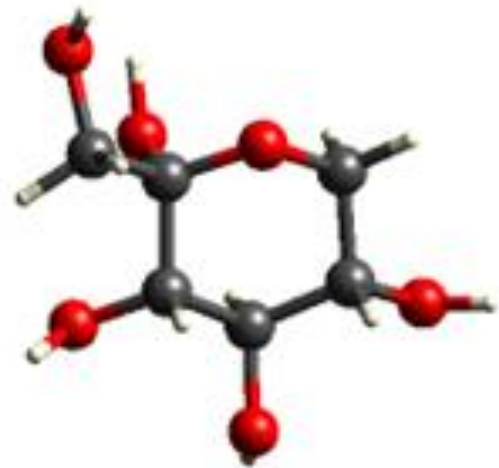

**(b)**

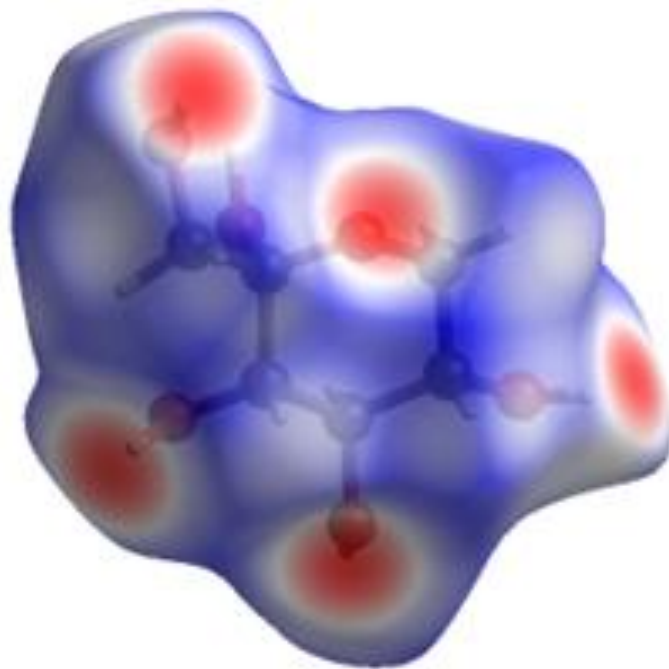

**(a)**

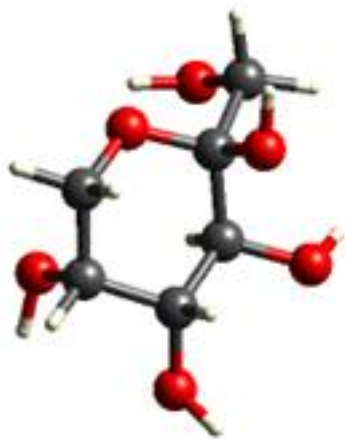

**(b)**

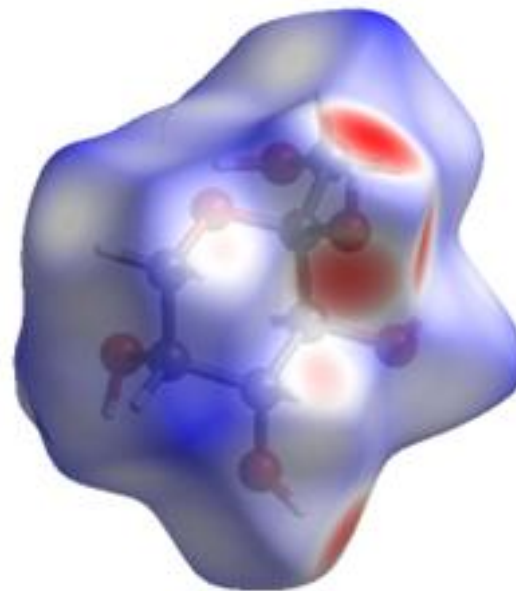

Hirshfeld surface analysis of D-fructose. (a) Molecular structure of D-fructose. (b) Hirshfeld surface analysis for the entire D-fructose crystal.

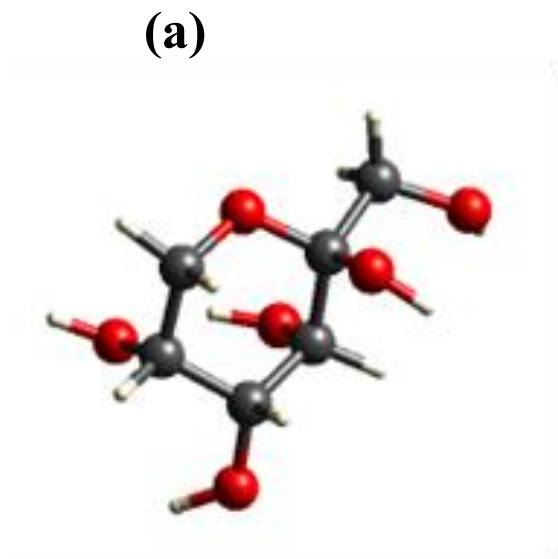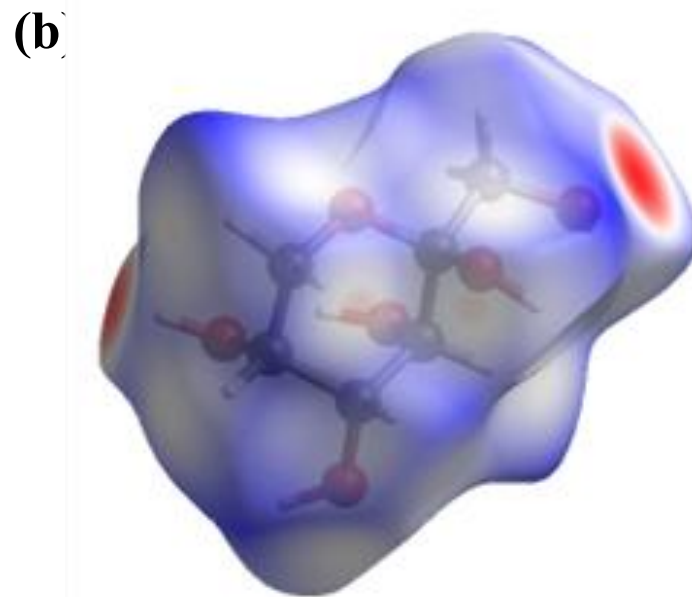

Fig. S16 Hirshfeld surface analysis of D-psicose. (a) Molecular structure of D-psicose. (b) Hirshfeld surface analysis for the entire D-psicose crystal.

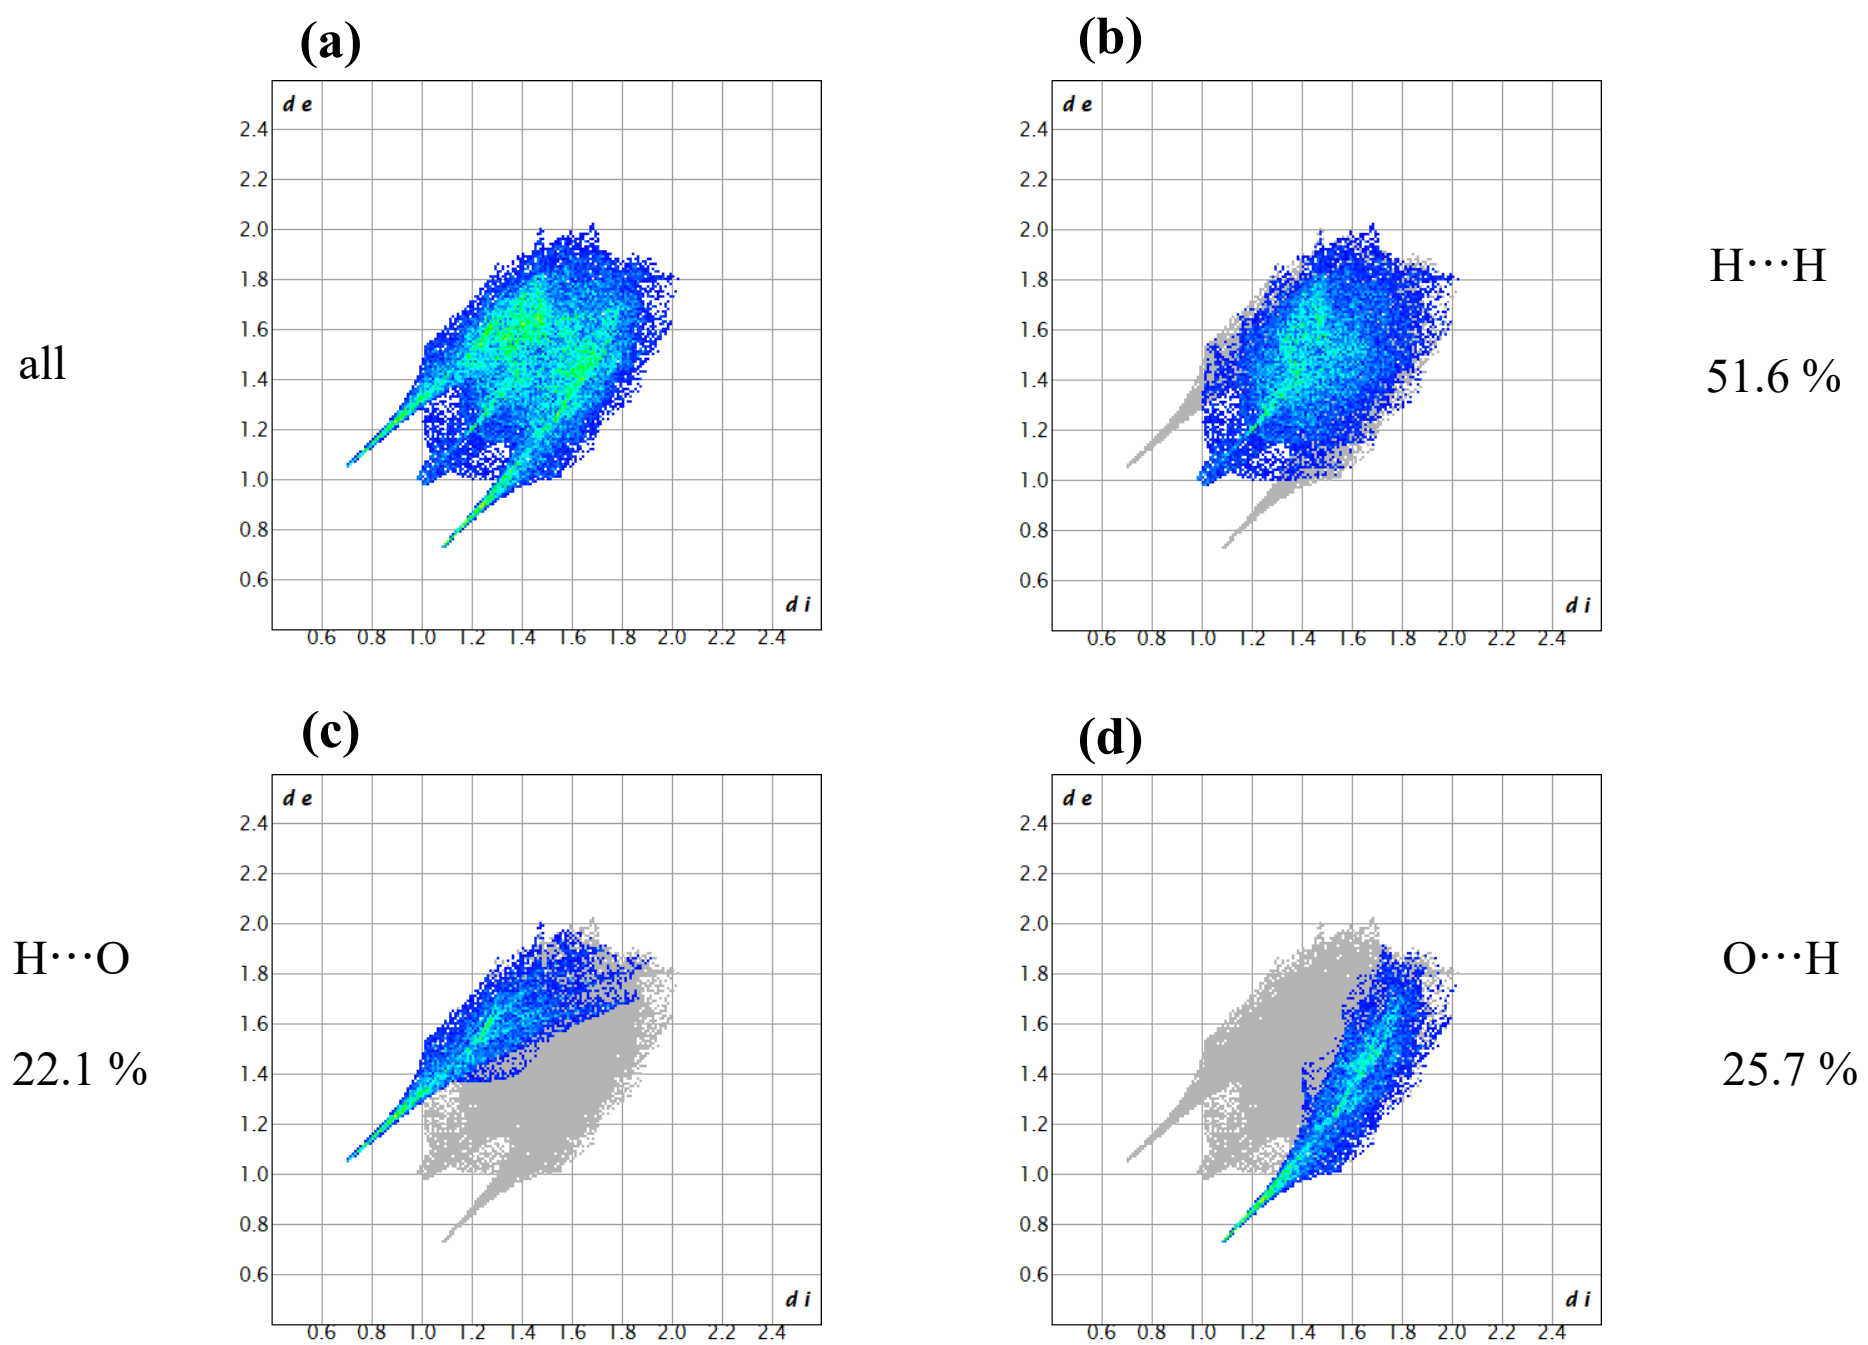

Fig. S17

2D fingerprint plots for the D-enantiomer of D,L-sorbose.

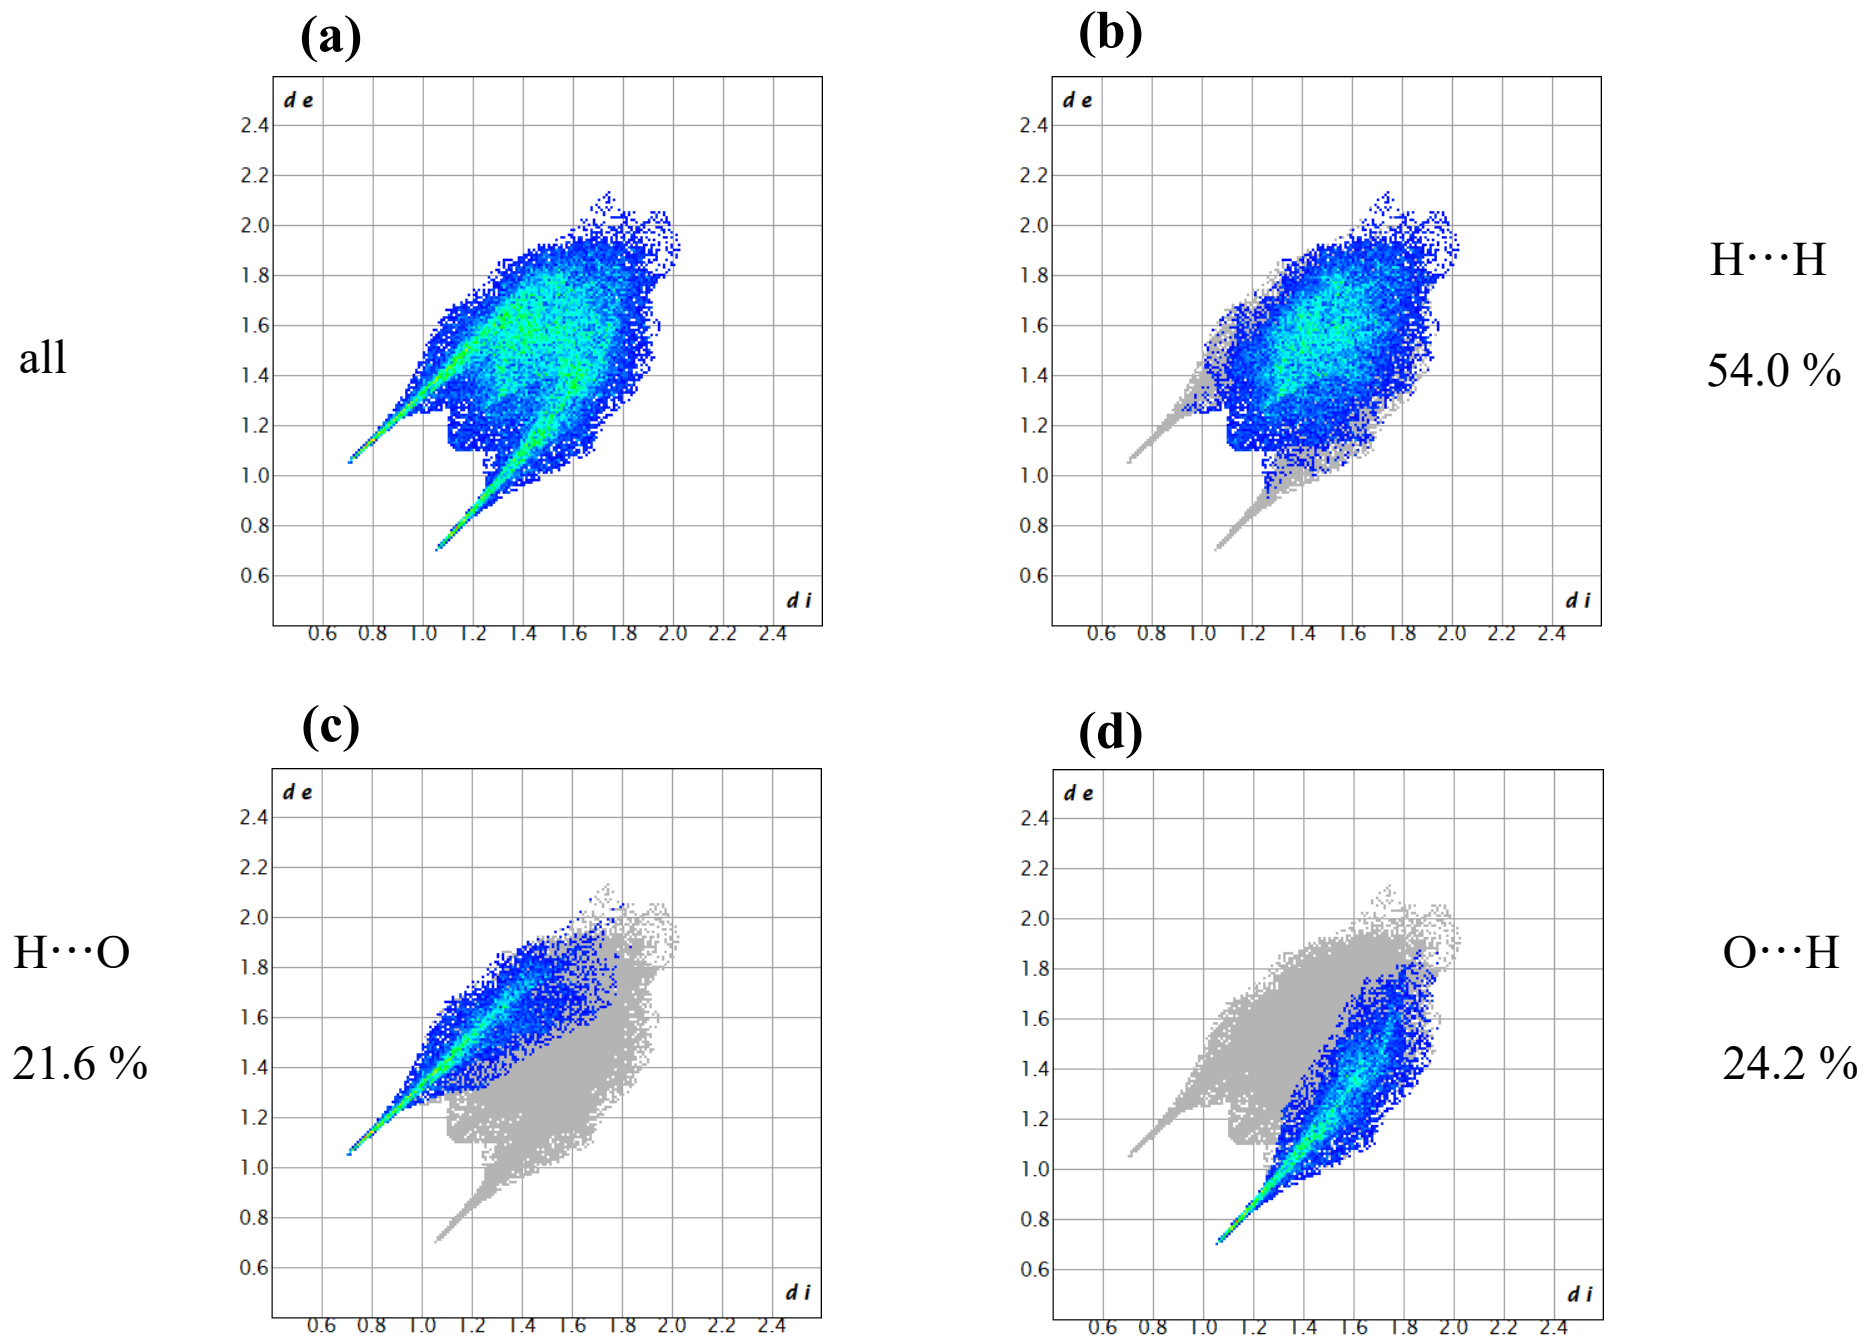

Fig. S18

2D fingerprint plots for the D-enantiomer of D,L-fructose.

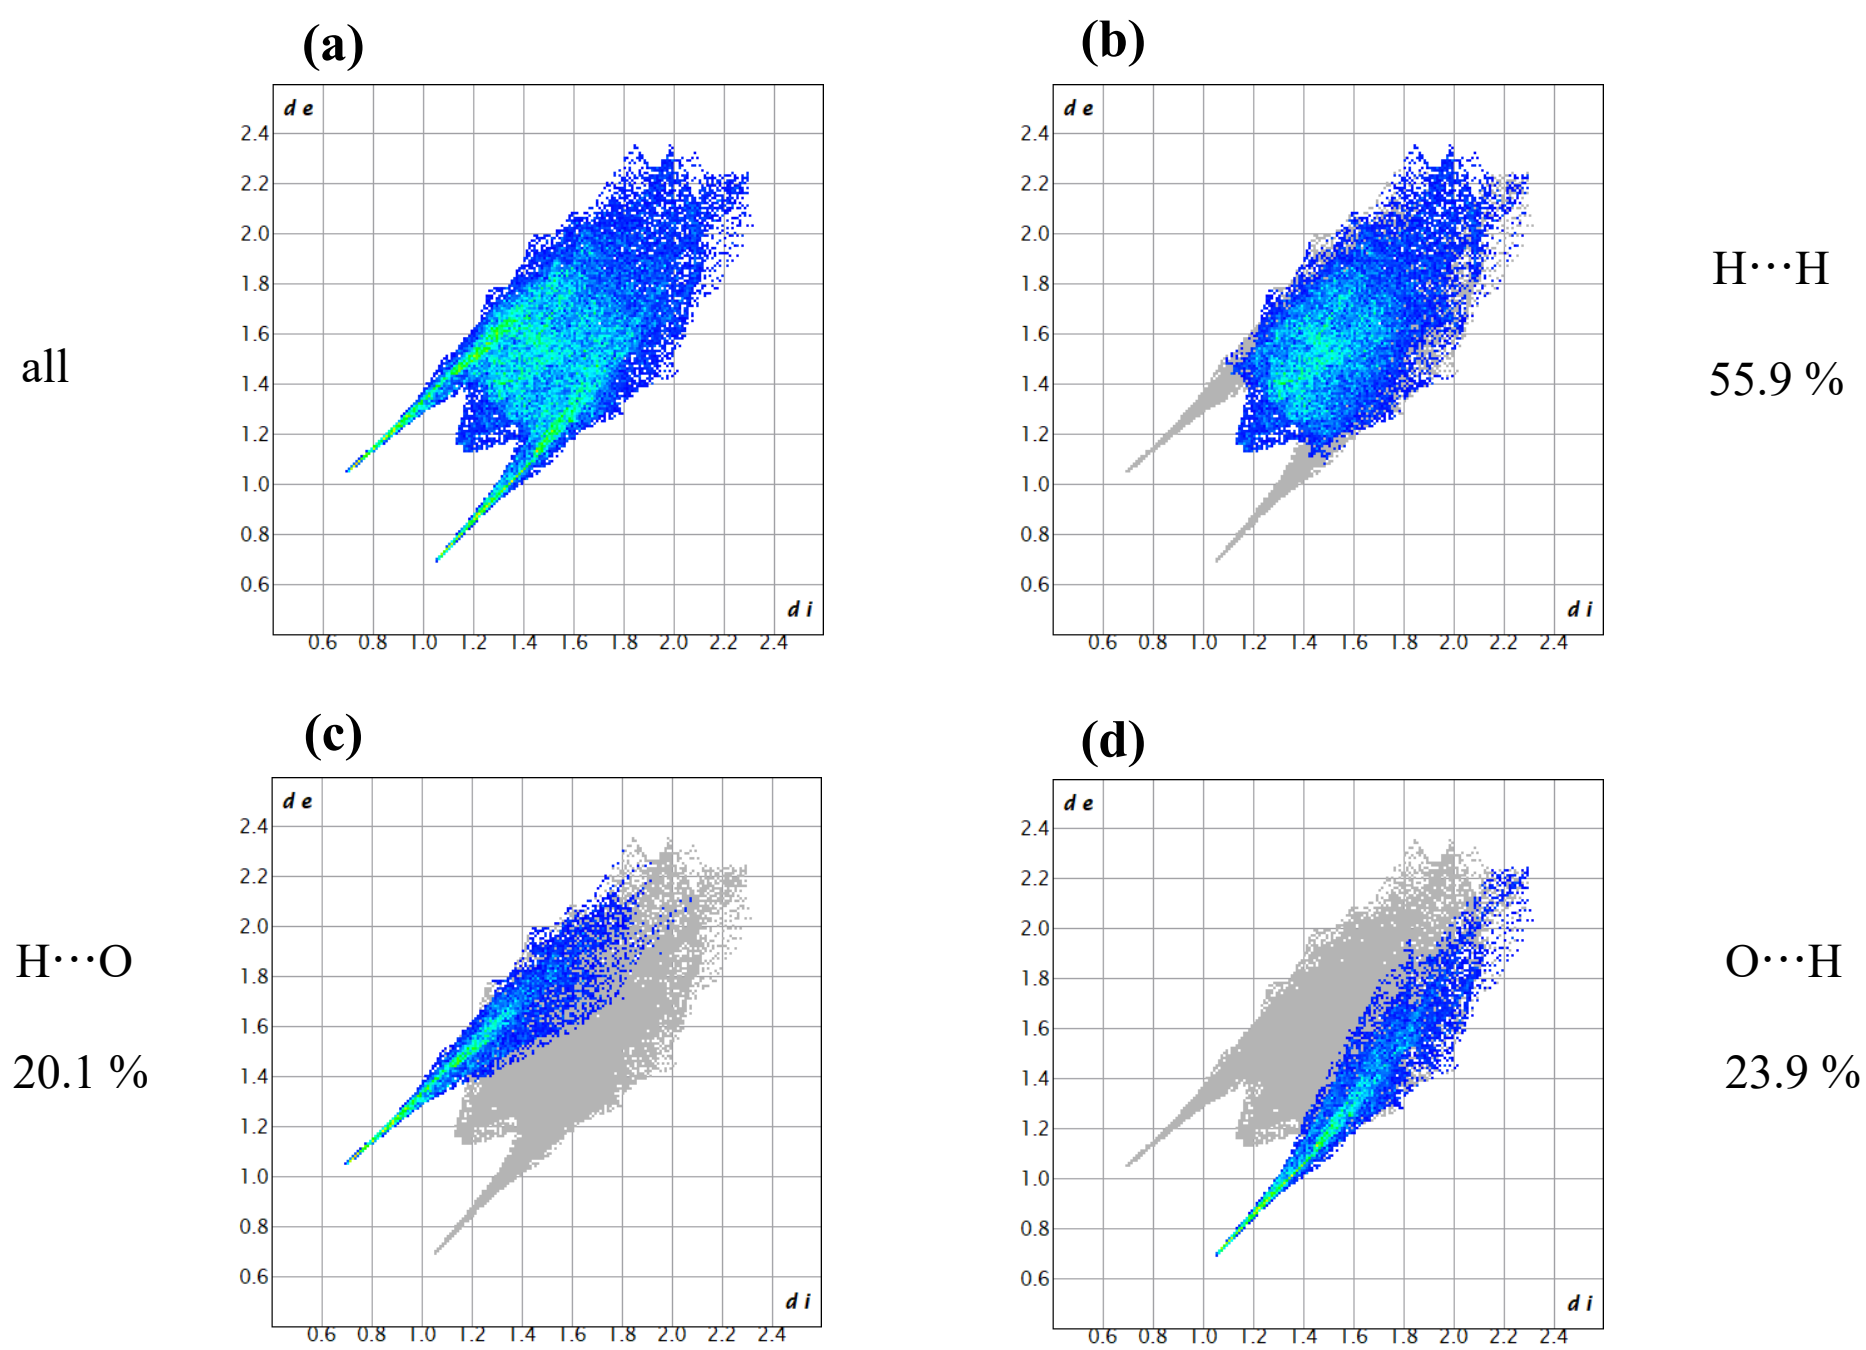

Fig. S19

2D fingerprint plots for the D-enantiomer of D,L-psicose.

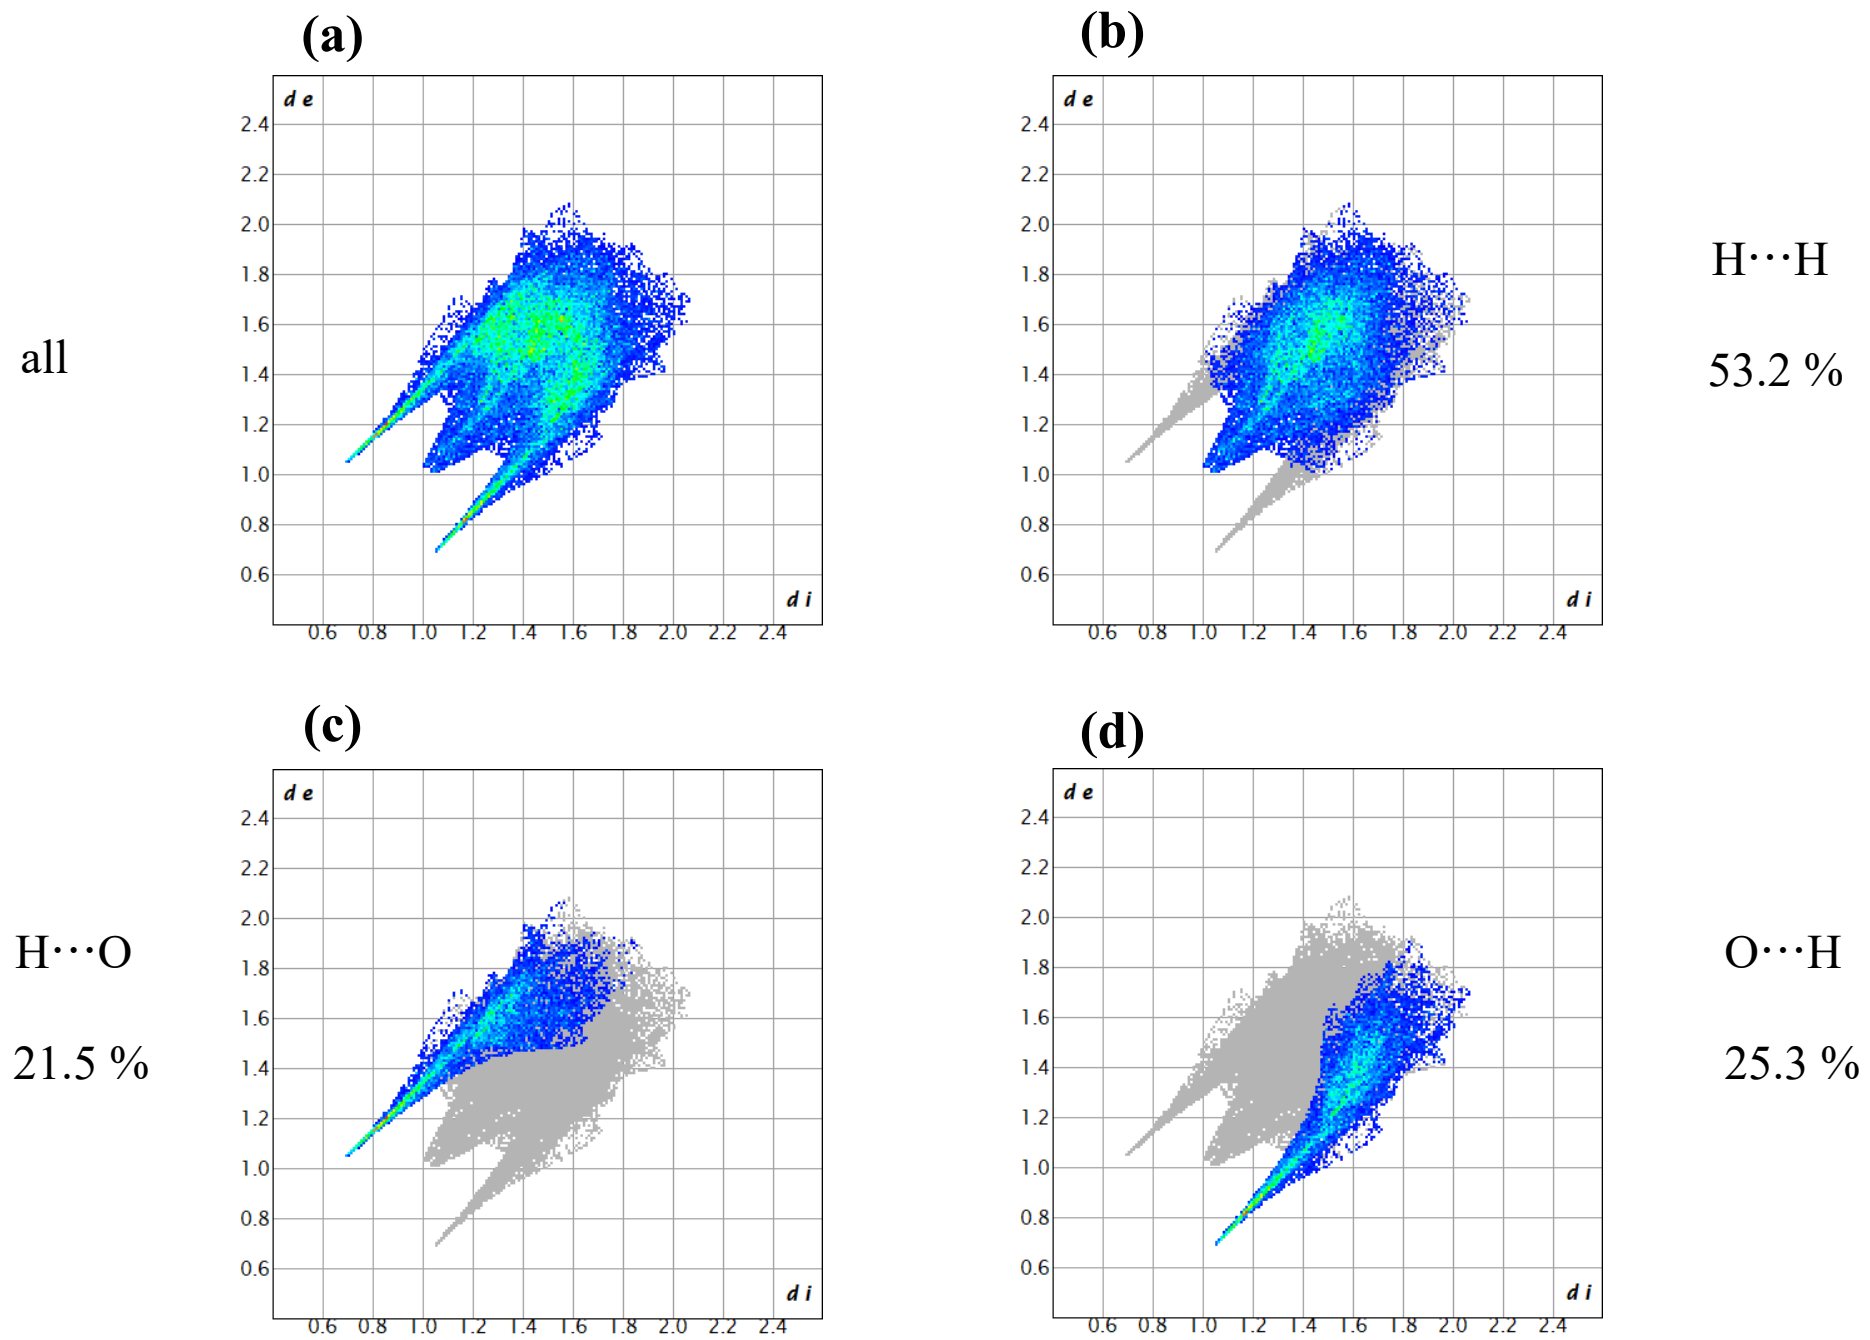

Fig. S20

2D fingerprint plots for D-tagatose.

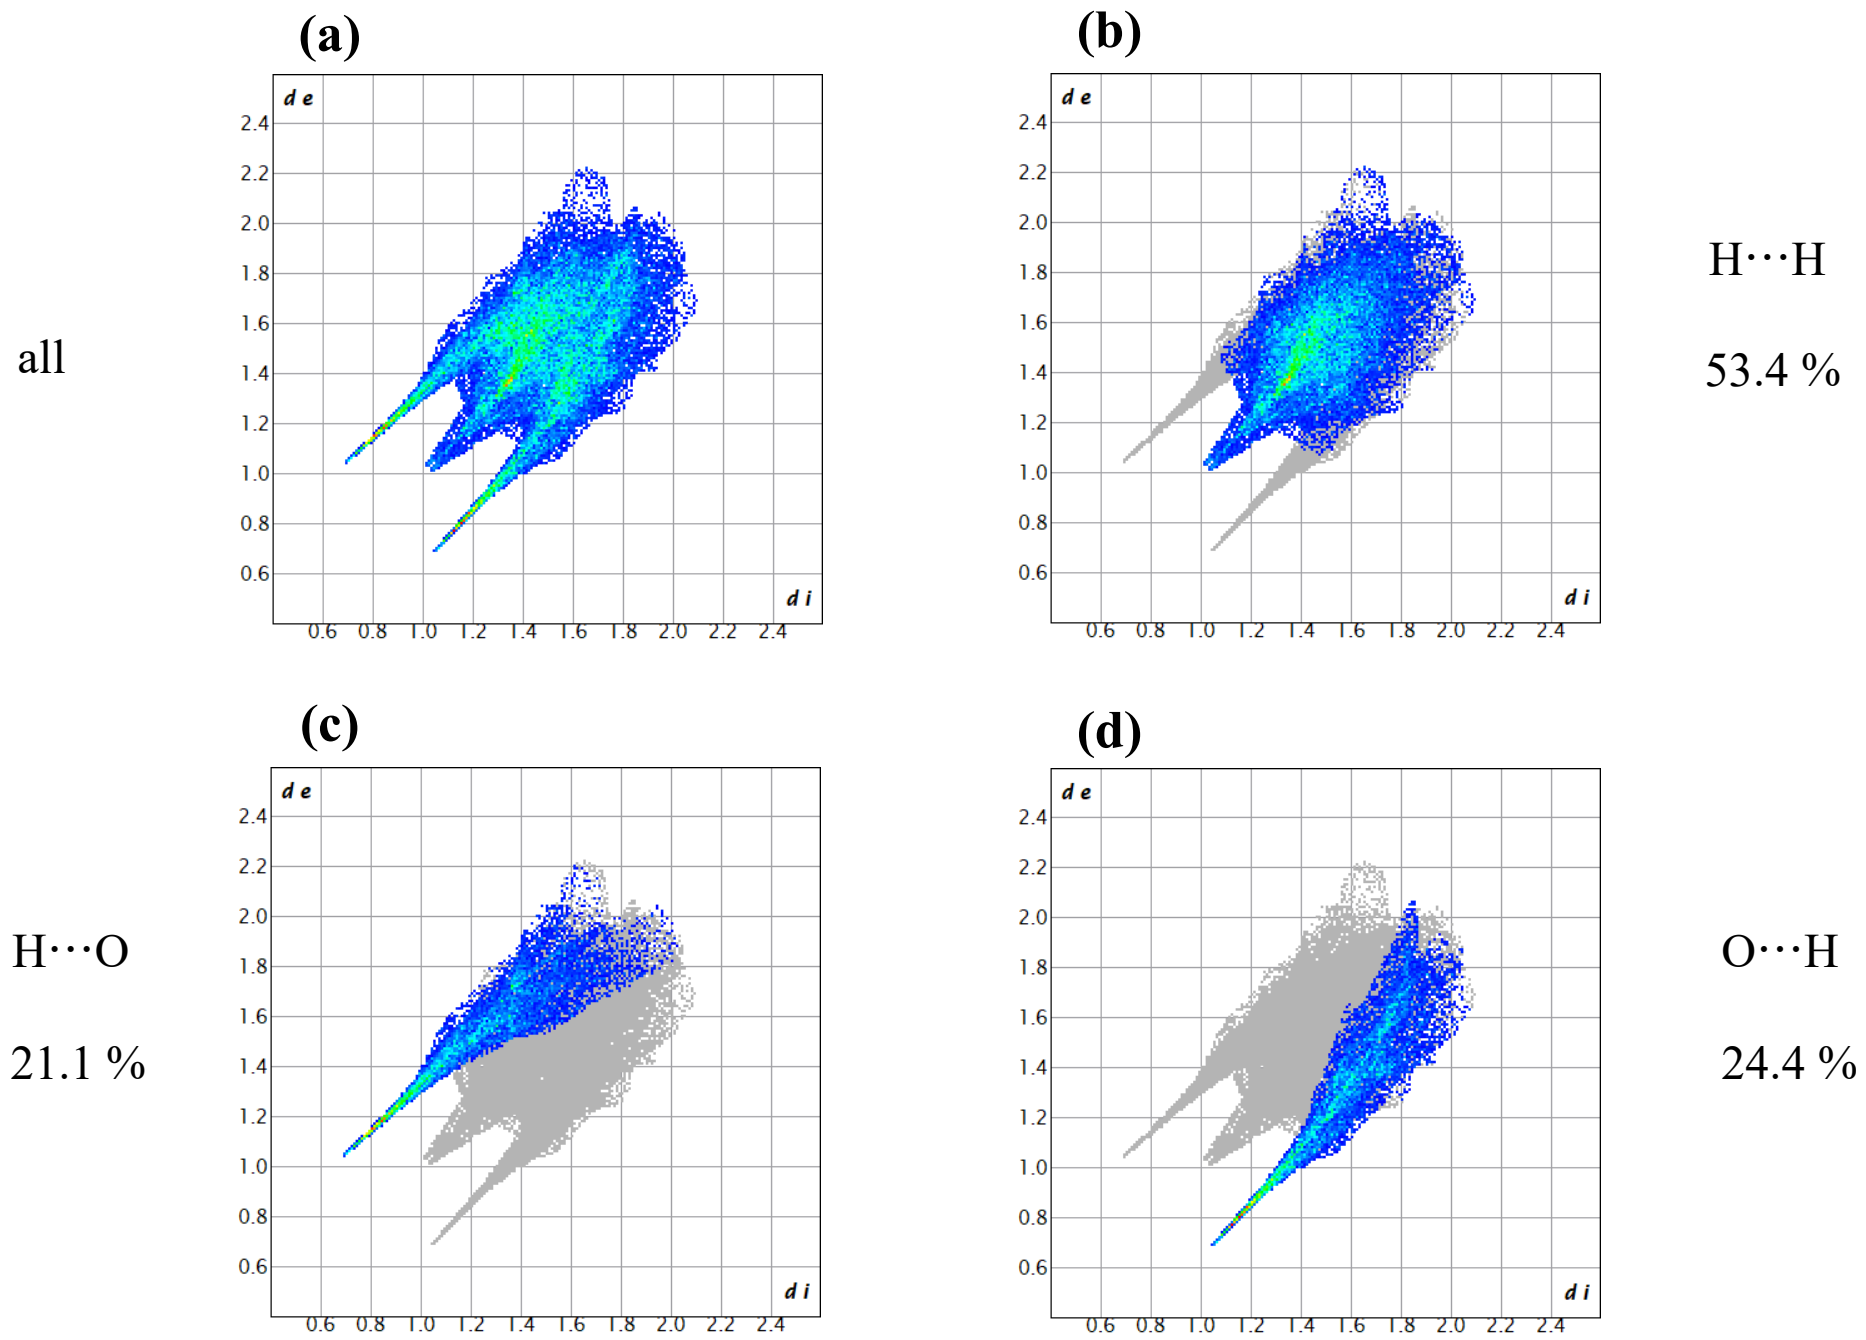

Fig. S21

2D fingerprint plots for L-sorbose

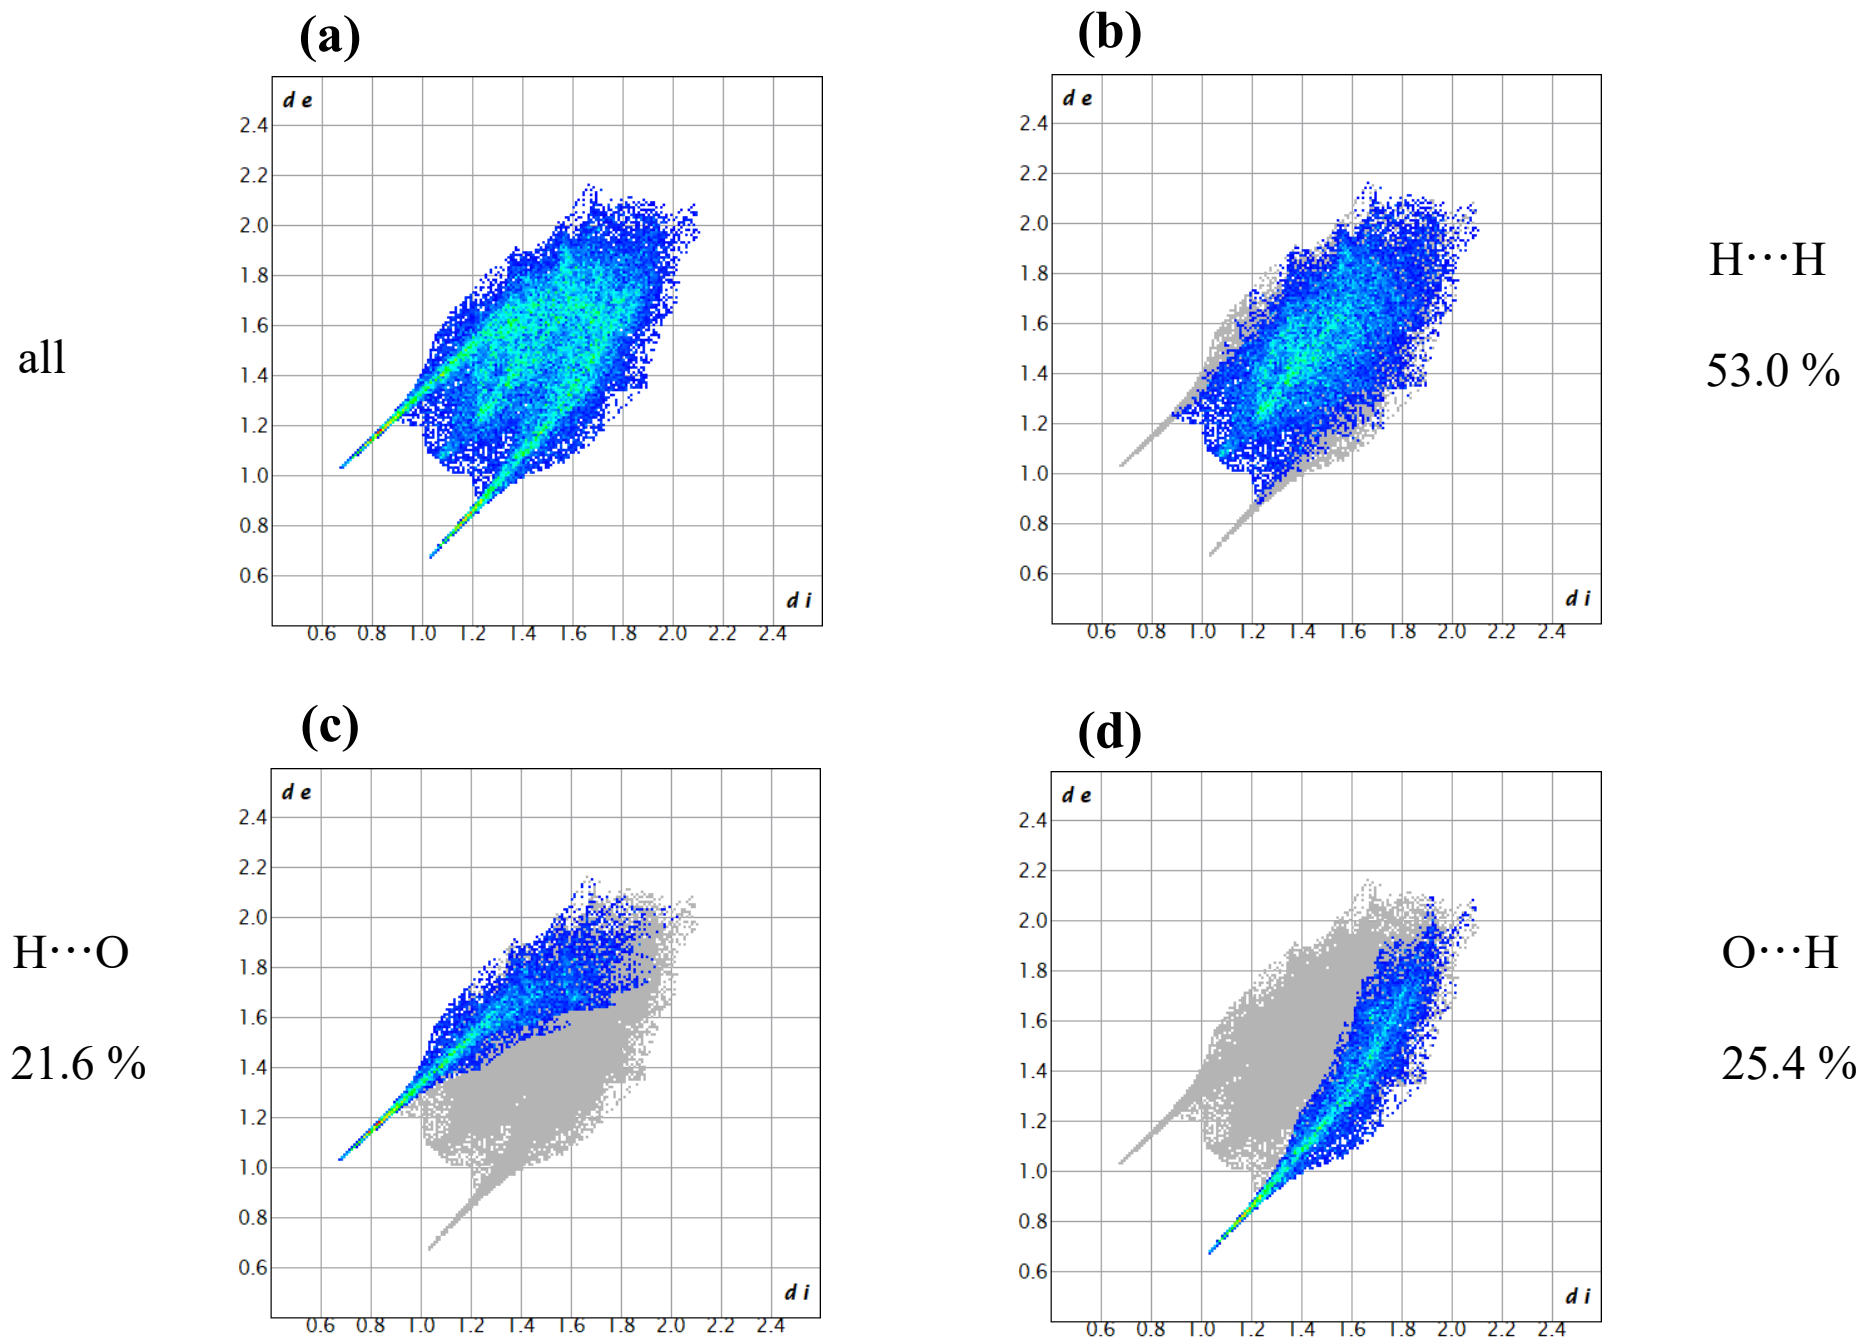

Fig. S22

2D fingerprint plots for fructose.

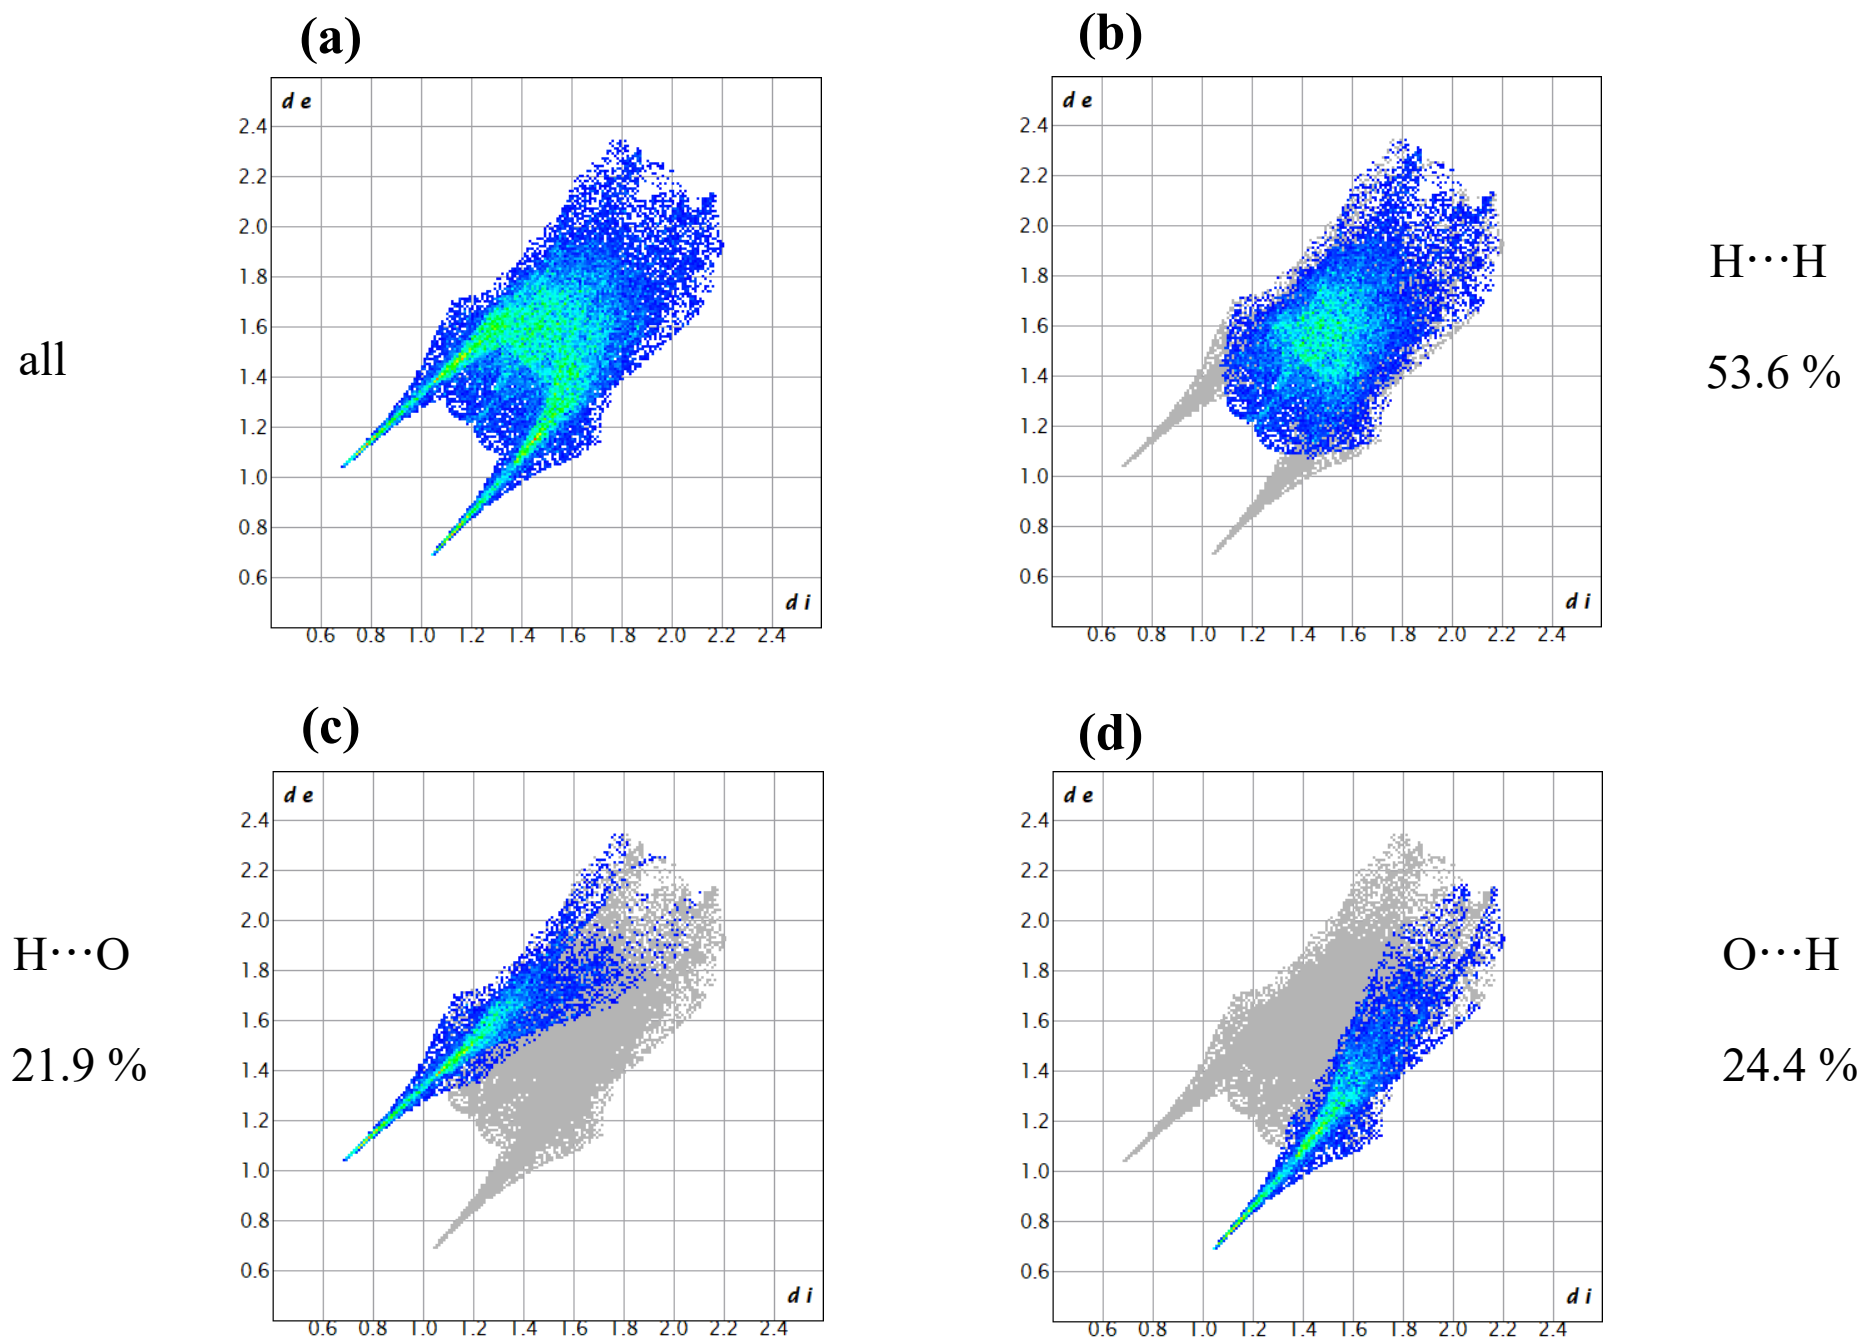

Fig. S23

2D fingerprint plots for D-psicose.

**(a)** tagatose

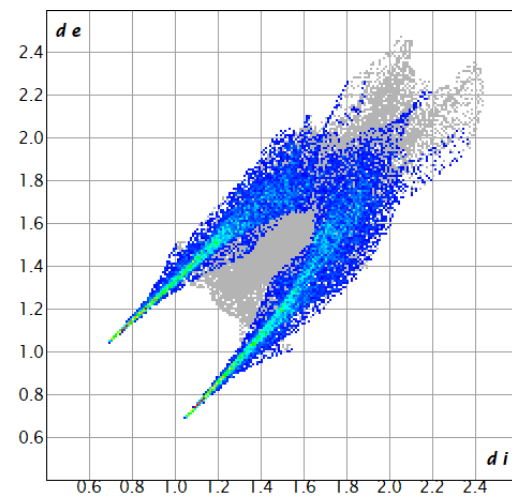

**(b)** sorbose

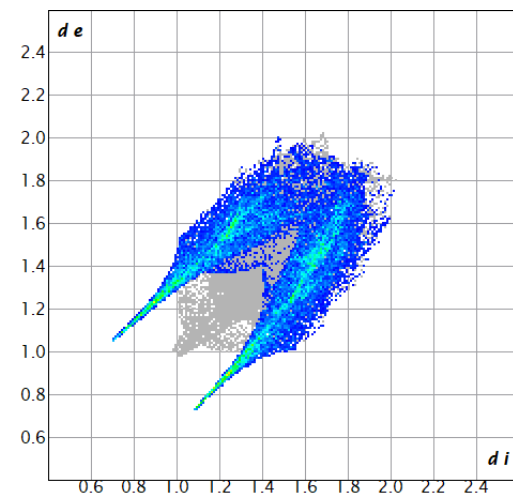

**(c)** fructose

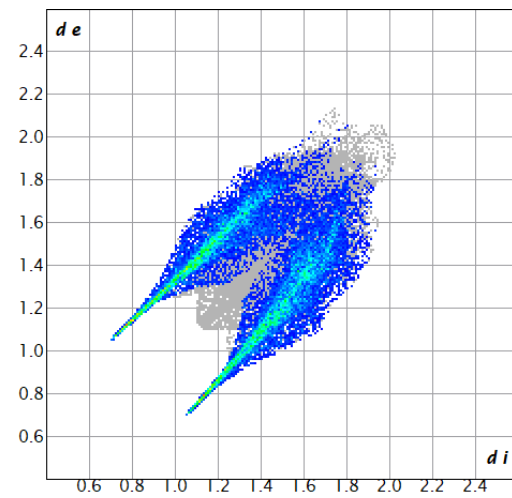

**(d)** psicose

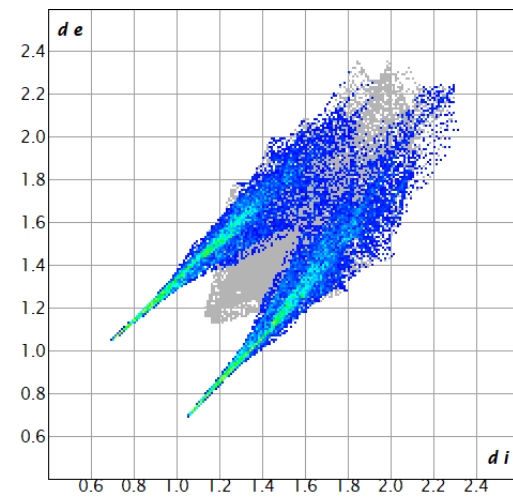

**(a)** tagatose

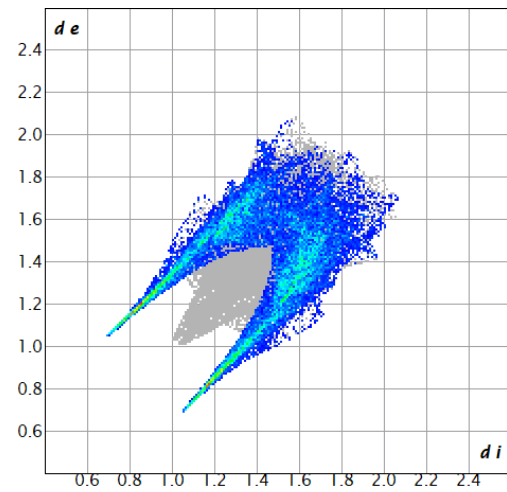

**(b)** sorbose

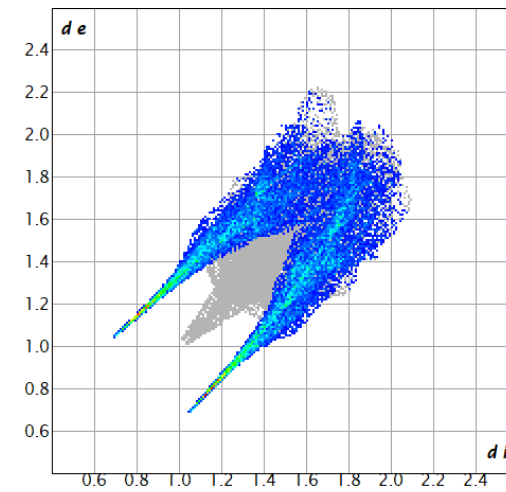

**(c)** fructose

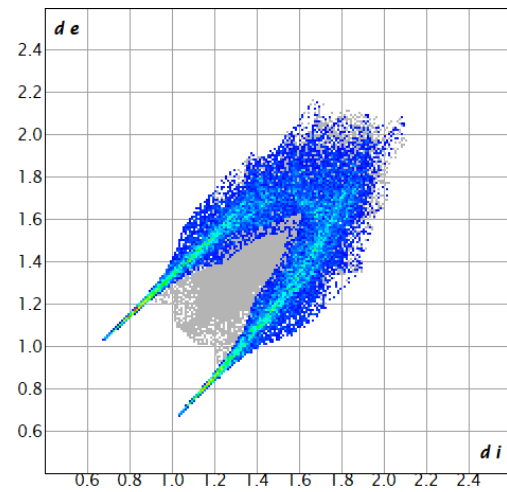

**(d)** psicose

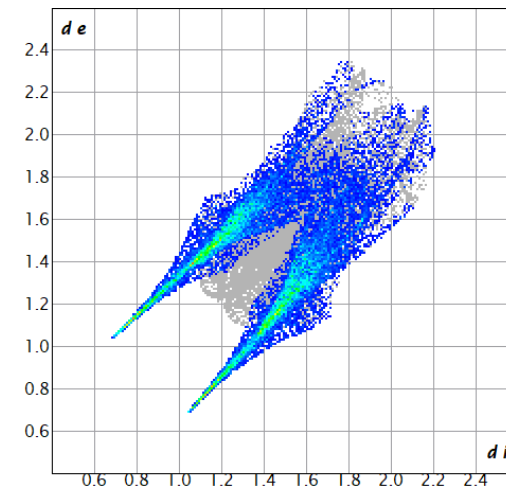

**(a)**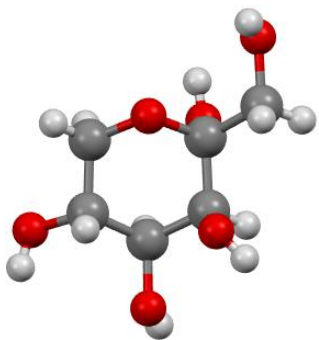**(b)**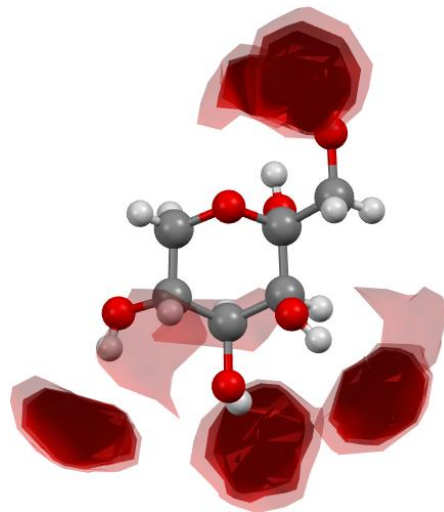**(c)**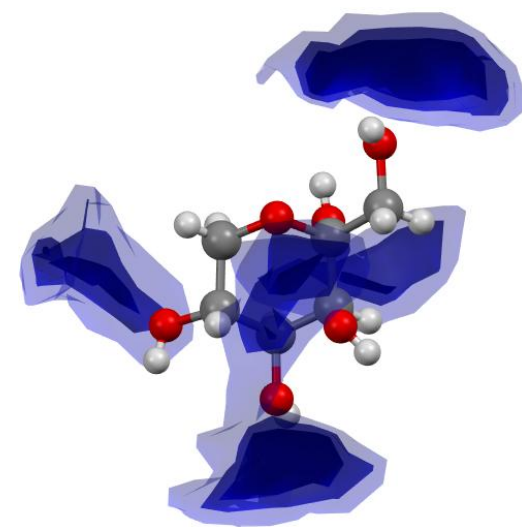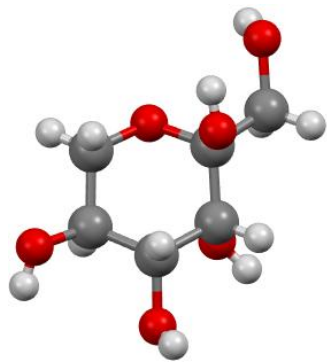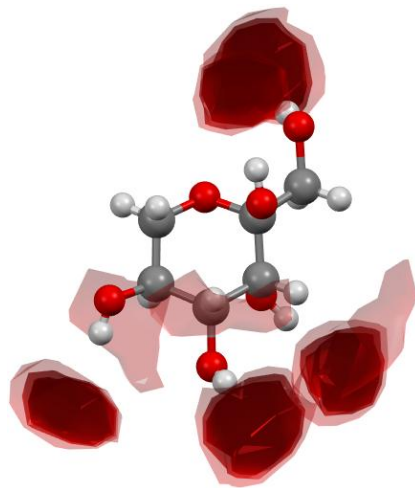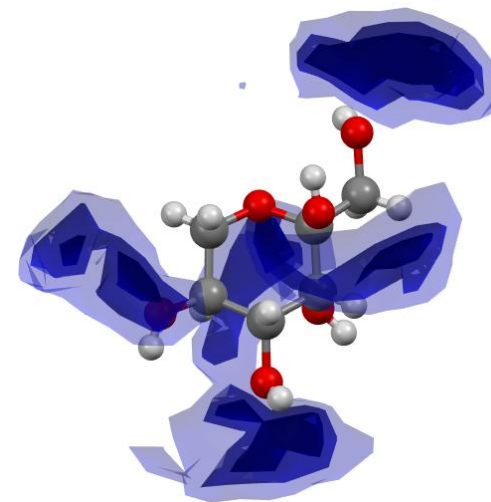

**(a)**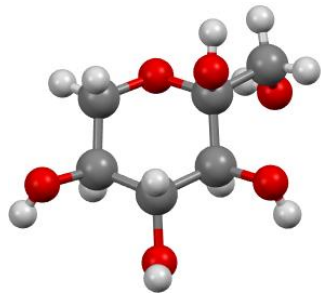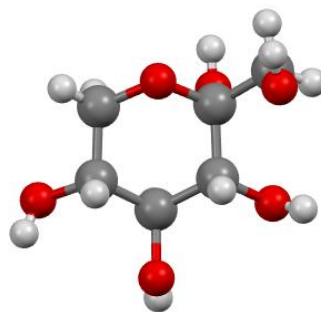**(b)**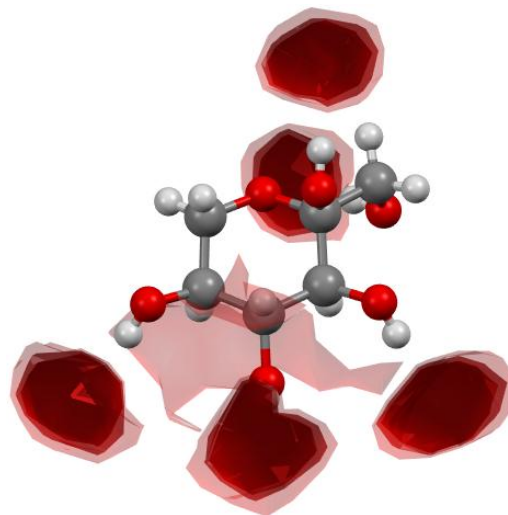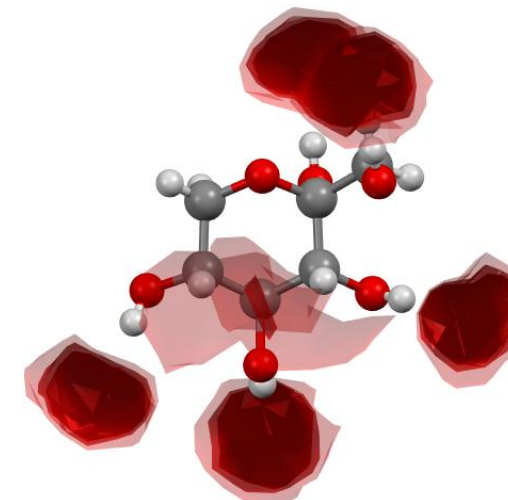**(c)**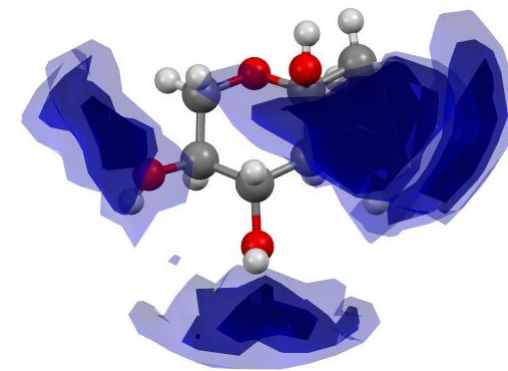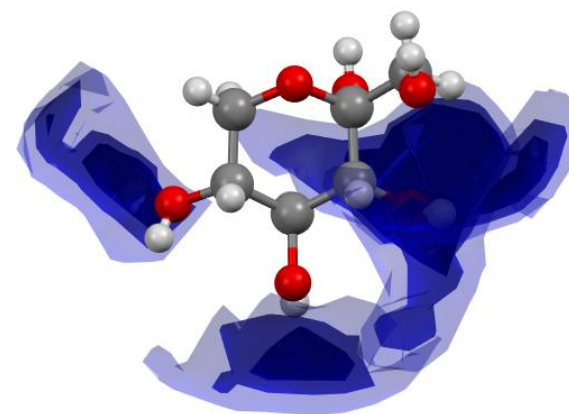

Fig. S27 FIMs analysis results for D,L-sorbose. (a) Molecular structure. (b) Full interaction map (acceptor-type hydrogen bonding). (c) Full interaction map (donor-type hydrogen bonding). In panels (a)–(c), results for the L-form are shown in the upper part, and those for the D-form are shown in the lower part.

**(a)**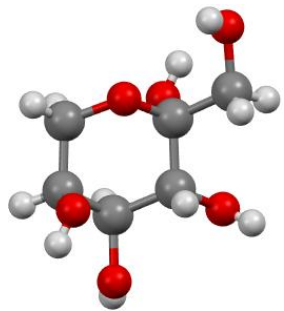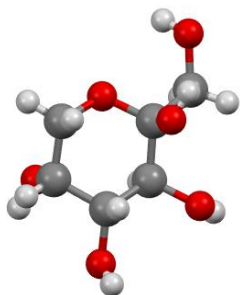**(b)**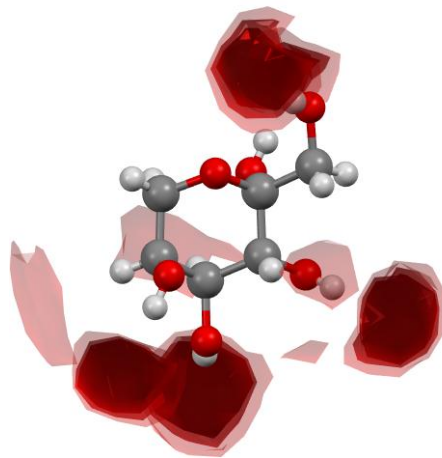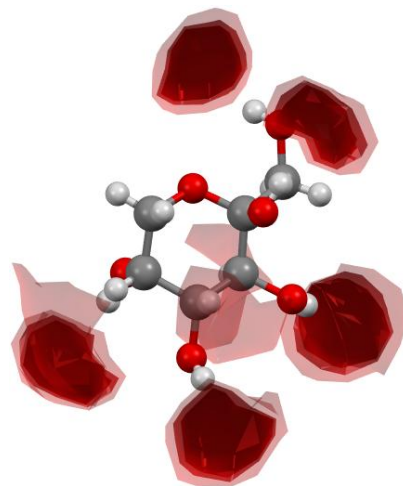**(c)**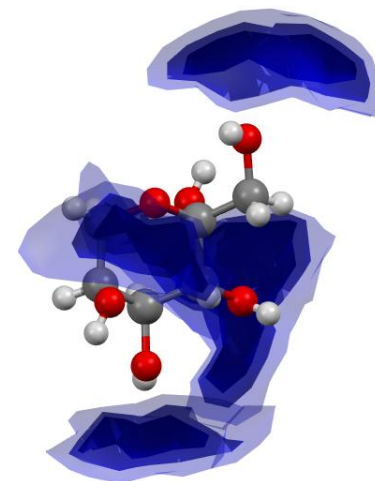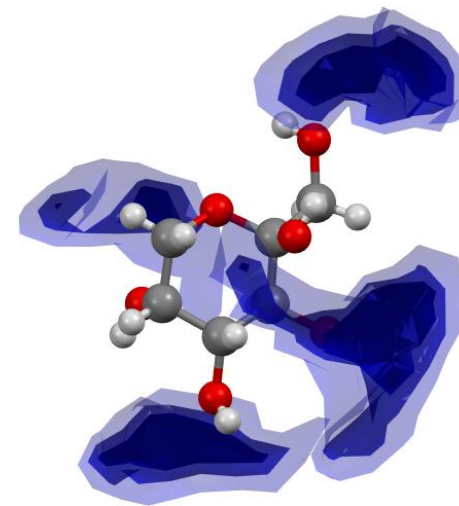

Fig. S28 FIMs analysis results for D,L-fructose. (a) Molecular structure. (b) Full interaction map (acceptor-type hydrogen bonding). (c) Full interaction map (donor-type hydrogen bonding). In panels (a)–(c), results for the L-form are shown in the upper part, and those for the D-form are shown in the lower part.

**(a)**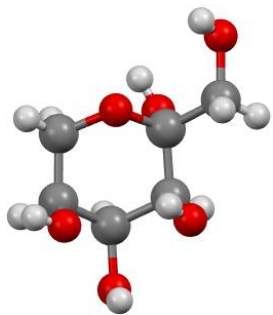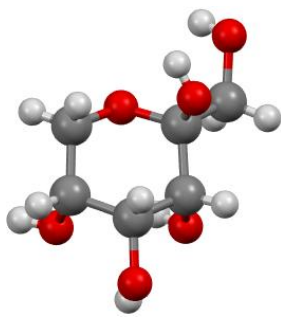**(b)**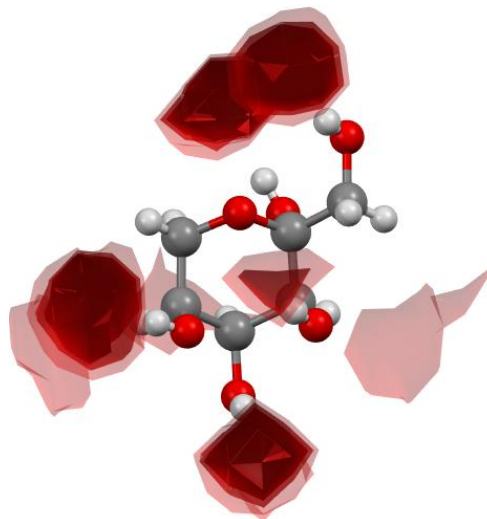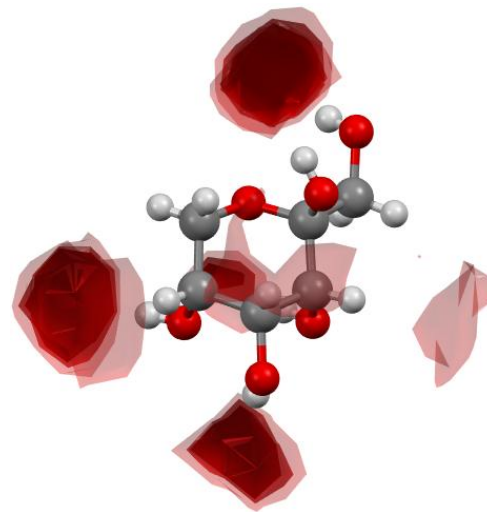**(c)**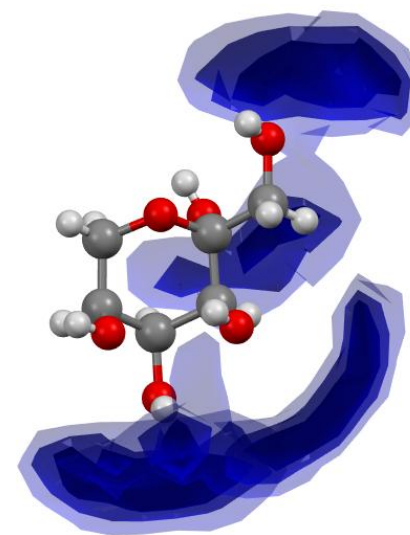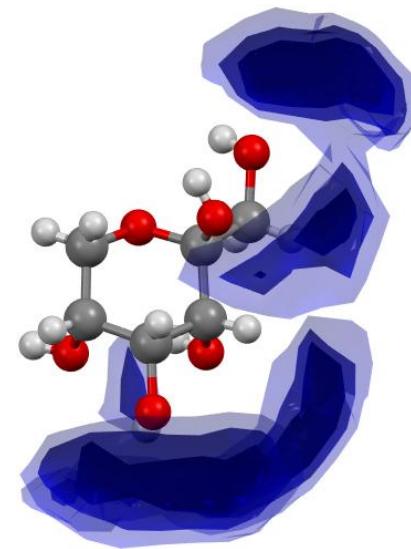

Fig. S29 FIMs analysis results for D,L-psicose. (a) Molecular structure. (b) Full interaction map (acceptor-type hydrogen bonding). (c) Full interaction map (donor-type hydrogen bonding). In panels (a)–(c), results for the L-form are shown in the upper part, and those for the D-form are shown in the lower part.

**(a)**

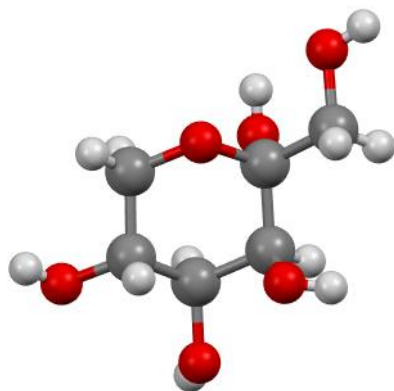

**(b)**

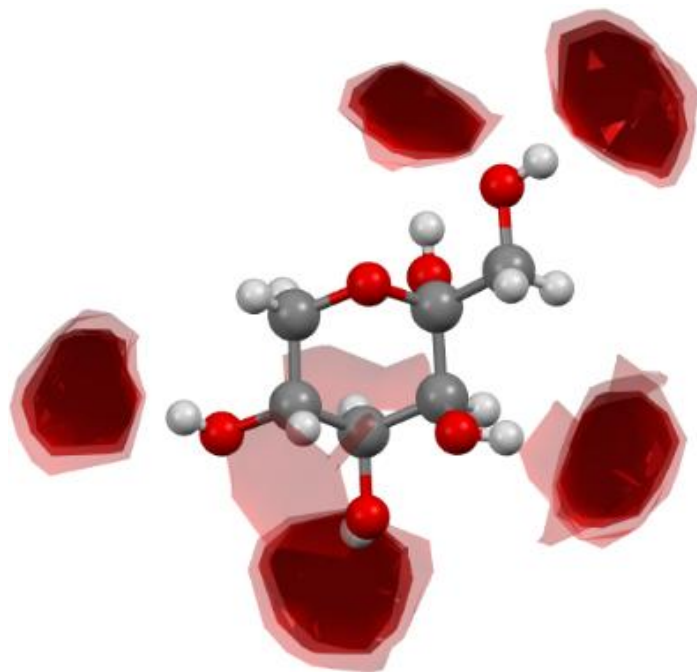

**(c)**

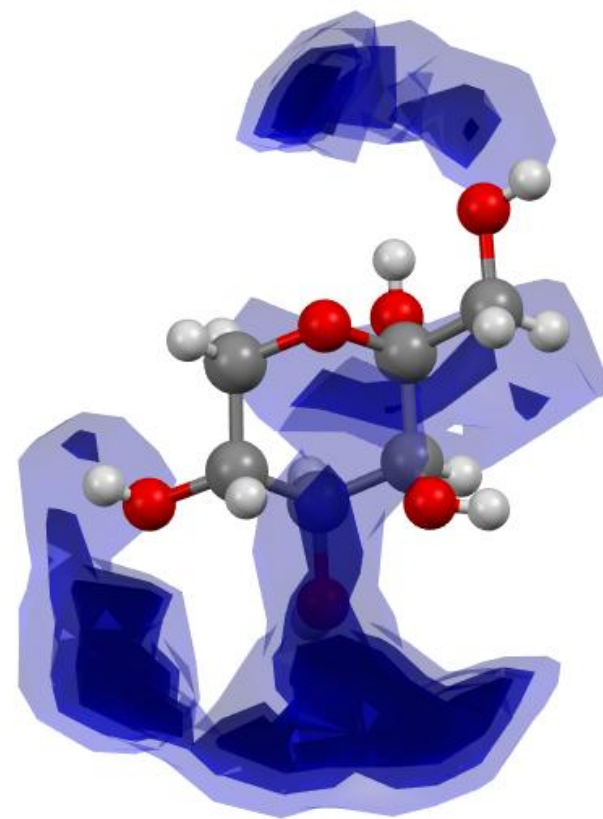

**(a)**

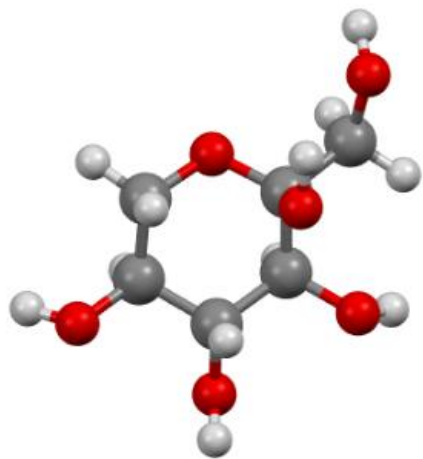

**(b)**

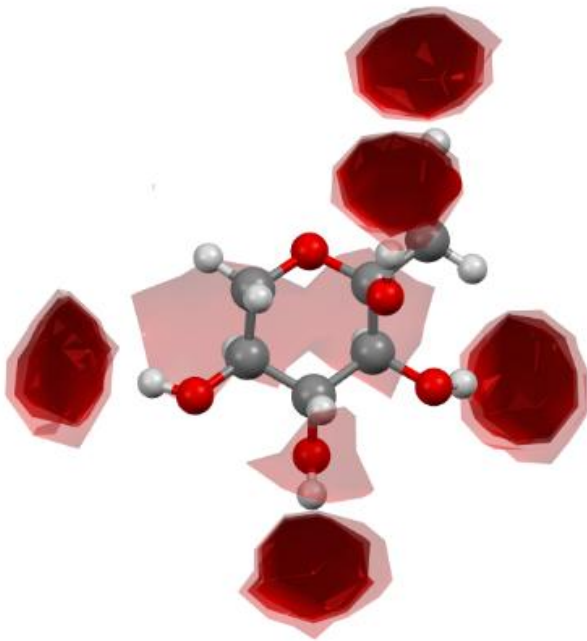

**(c)**

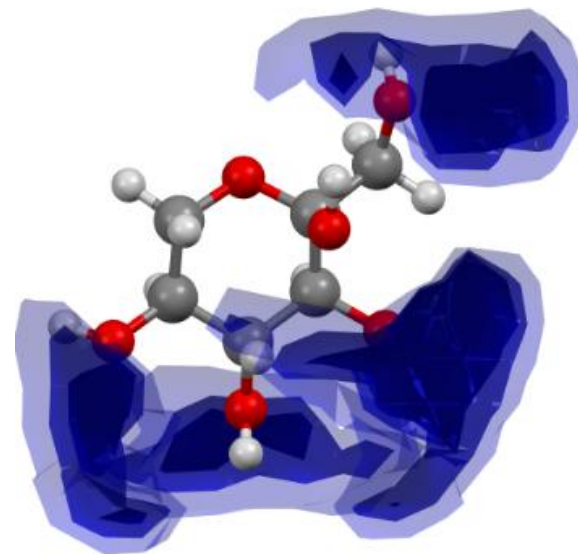

Fig. S31 FIMs analysis results for L-sotbose. (a) Molecular structure. (b) Full interaction map (acceptor-type hydrogen bonding). (c) Full interaction map (donor-type hydrogen bonding).

**(a)**

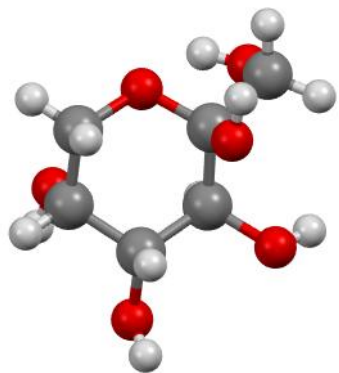

**(b)**

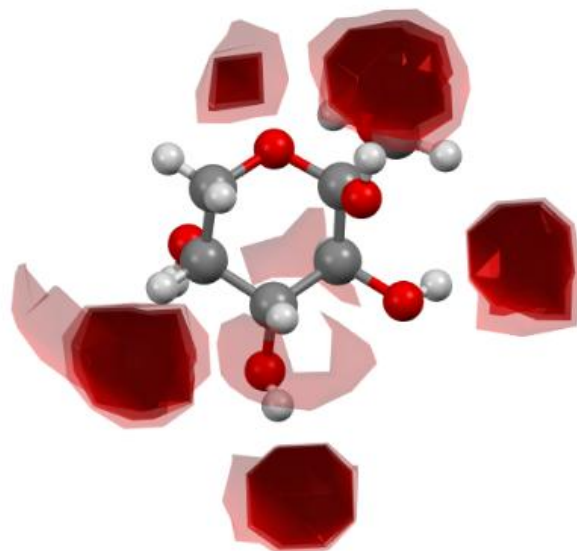

**(c)**

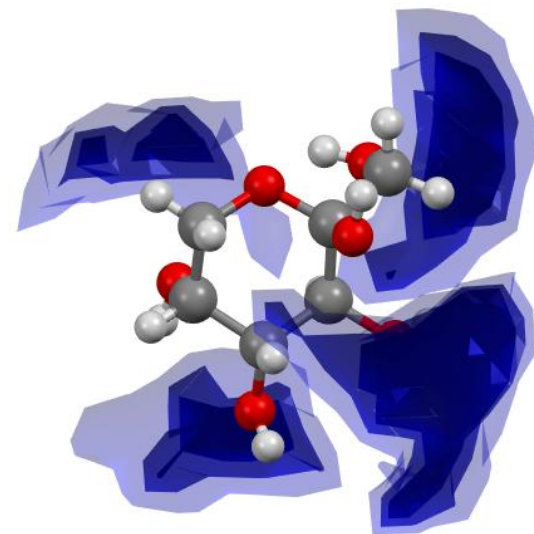

**(a)**

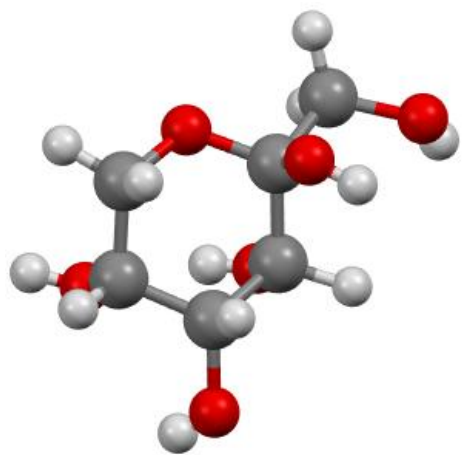

**(b)**

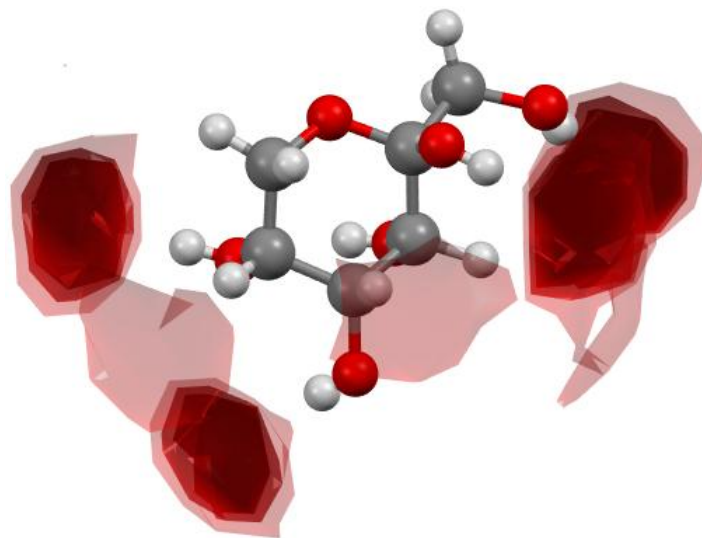

**(c)**

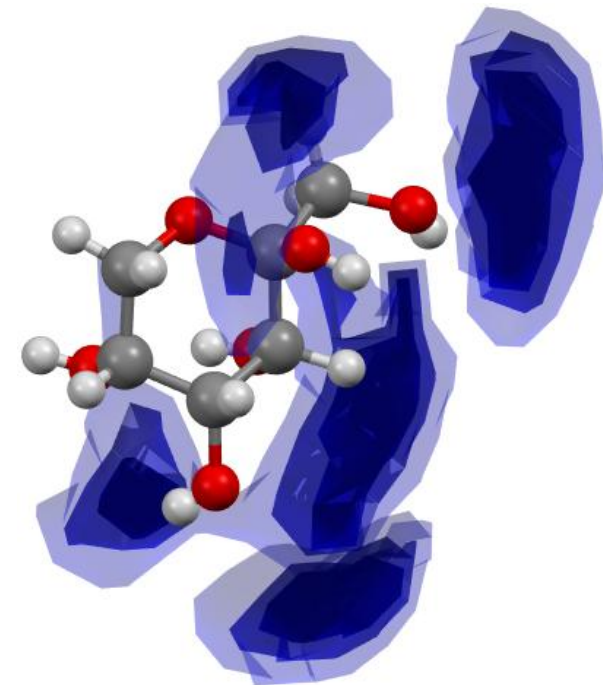

Fig. S33 FIMs analysis results for D-psicose. (a) Molecular structure. (b) Full interaction map (acceptor-type hydrogen bonding). (c) Full interaction map (donor-type hydrogen bonding).

Table S1 Cell parameters of the four ketohexose chiral forms.

|                               | D-fructose                                                  | D-psicose                                                   | D-tagatose                                                  | L-sorbose                                                   |
|-------------------------------|-------------------------------------------------------------|-------------------------------------------------------------|-------------------------------------------------------------|-------------------------------------------------------------|
| Formula                       | C <sub>6</sub> H <sub>12</sub> O <sub>6</sub>               |
| Crystal System                | Orthorhombic                                                | Orthorhombic                                                | Orthorhombic                                                | Orthorhombic                                                |
| Space Group                   | <i>P</i> 2 <sub>1</sub> 2 <sub>1</sub> 2 <sub>1</sub> (#19) | <i>P</i> 2 <sub>1</sub> 2 <sub>1</sub> 2 <sub>1</sub> (#19) | <i>P</i> 2 <sub>1</sub> 2 <sub>1</sub> 2 <sub>1</sub> (#19) | <i>P</i> 2 <sub>1</sub> 2 <sub>1</sub> 2 <sub>1</sub> (#19) |
| a [Å]                         | 8.0818 (4)                                                  | 8.693 (2)                                                   | 6.22010 (10)                                                | 6.545 (2)                                                   |
| b [Å]                         | 9.1394 (4)                                                  | 11.185 (4)                                                  | 6.50220 (10)                                                | 18.062 (7)                                                  |
| c [Å]                         | 9.9546 (5)                                                  | 7.745 (2)                                                   | 17.6629 (4)                                                 | 6.310 (2)                                                   |
| α [°]                         | 90                                                          | 90                                                          | 90                                                          | 90                                                          |
| β [°]                         | 90                                                          | 90                                                          | 90                                                          | 90                                                          |
| γ [°]                         | 90                                                          | 90                                                          | 90                                                          | 90                                                          |
| Cell Volume [Å <sup>3</sup> ] | 735.275                                                     | 753.056                                                     | 714.364                                                     | 745.942                                                     |
| Z                             | 4                                                           | 4                                                           | 4                                                           | 4                                                           |
| Z'                            | 1                                                           | 1                                                           | 1                                                           | 1                                                           |
| R-Factor [%]                  | 2.03                                                        | 4.3                                                         | 2.47                                                        | 3.7                                                         |

Table S2 Cell parameters of the four ketohexose racemic forms.

|                               | D,L-fructose                                  | D,L-psicose                                   | D,L-tagatose                                  | D,L-sorbose                                   |
|-------------------------------|-----------------------------------------------|-----------------------------------------------|-----------------------------------------------|-----------------------------------------------|
| Formula                       | C <sub>6</sub> H <sub>12</sub> O <sub>6</sub> |
| Crystal System                | Triclinic                                     | Orthorhombic                                  | Monoclinic                                    | Monoclinic                                    |
| Space Group                   | <i>P</i> $\bar{1}$ (#2)                       | <i>P</i> na2 <sub>1</sub> (#33)               | <i>P</i> 2 <sub>1</sub> / <i>c</i> (#14)      | <i>P</i> 2 <sub>1</sub> / <i>a</i> (#14)      |
| a [Å]                         | 5.43124 (19)                                  | 11.2629(5)                                    | 8.11340 (10)                                  | 12.8152 (3)                                   |
| b [Å]                         | 7.2727 (3)                                    | 5.3552(3)                                     | 9.4936 (2)                                    | 6.29489 (13)                                  |
| c [Å]                         | 10.1342 (4)                                   | 12.6538(6)                                    | 10.4731 (2)                                   | 18.9482 (4)                                   |
| α [°]                         | 69.120 (2)                                    | 90                                            | 90                                            | 90                                            |
| β [°]                         | 83.907 (2)                                    | 90                                            | 103.067 (7)                                   | 108.3472 (12)                                 |
| γ [°]                         | 78.381 (2)                                    | 90                                            | 90                                            | 90                                            |
| Cell Volume [Å <sup>3</sup> ] | 366.088                                       | 763.215                                       | 785.806                                       | 1450.85                                       |
| Z                             | 2                                             | 4                                             | 4                                             | 8                                             |
| Z'                            | 1                                             | 1                                             | 2                                             | 2                                             |
| R-Factor [%]                  | 3.68                                          | 4.75                                          | 3.77                                          | 4.42                                          |

Table S3 Comparison of densities between chiral and racemic forms of monosaccharides.

 $(\Delta = \text{racemic} - \text{Chiral})$ 

| Compound  | chiral | racemic | $\Delta$ density |
|-----------|--------|---------|------------------|
| psicose   | 1.588  | 1.567   | -0.021           |
| fructose  | 1.627  | 1.634   | 0.007            |
| allose    | 1.593  | 1.618   | 0.043            |
| arabinose | 1.627  | 1.655   | 0.025            |
| fucose    | 1.484  | 1.504   | 0.020            |

Table S4 Hydrogen-bond pairs forming the Interaction frames in D-fructose.

|    | Step 1  | Step 2  | Step 3  | Step 4  | Interaction frame |
|----|---------|---------|---------|---------|-------------------|
| O1 | O1 – O3 | O3 – O5 | –       | –       | dimer             |
| O2 | O2 – O1 | O1 – O3 | O4 – O2 | –       | triangular        |
| O2 | O2 – O1 | O2 – O1 | O5 – O2 | O5 – O2 | square            |
| O2 | O2 – O1 | O5 – O2 | O5 – O2 | O4 – O2 | square            |
| O3 | O3 – O5 | O1 – O3 | –       | –       | dimer             |
| O4 | O4 – O2 | O3 – O5 | O5 – O2 | –       | triangular        |
| O5 | –       | –       | –       | –       | –                 |
| O6 | –       | –       | –       | –       | –                 |

Table S5 Hydrogen-bond pairs forming the Interaction frames in D,L-fructose, centered on the D molecule.

|    | Step 1          | Step 2          | Step 3 | Step 4 | Interaction frame |
|----|-----------------|-----------------|--------|--------|-------------------|
| O1 | O1(#D) – O3(#D) | O4(#D) – O5(#D) | –      | –      | dimer             |
| O2 | O2(#D) – O1(#L) | O2(#L) – O1(#D) | –      | –      | dimer             |
| O3 | O3(#D) – O4(#L) | O3(#L) – O4(#D) | –      | –      | dimer             |
| O4 | O4(#D) – O5(#D) | O1(#D) – O3(#D) | –      | –      | dimer             |
| O5 | O5(#D) – O4(#L) | O5(#L) – O4(#D) | –      | –      | dimer             |
| O6 | –               | –               | –      | –      | –                 |

Table S6 Hydrogen-bond pairs forming the Interaction frames in L-sorbose.

|    | Step 1  | Step 2  | Step 3  | Step 4 | Interaction frame |
|----|---------|---------|---------|--------|-------------------|
| O1 | O1 – O3 | O4 – O6 | –       | –      | dimer             |
| O2 | O2 – O5 | O4 – O6 | O2 – O5 | –      | triangular        |
| O3 | O3 – O4 | O3 – O4 | O5 – O2 | –      | triangular        |
| O3 | O3 – O4 | O5 – O2 | O3 – O4 | –      | triangular        |
| O4 | O4 – O6 | O1 – O3 | –       | –      | dimer             |
| O5 | O5 – O2 | O3 – O4 | O3 – O4 | –      | triangular        |
| O6 | –       | –       | –       | –      | –                 |

Table S7 Hydrogen-bond pairs forming the Interaction frames in D,L-sorbose, centered on the L molecule.

|    | Step 1          | Step 2          | Step 3          | Step 4 | Interaction frame |
|----|-----------------|-----------------|-----------------|--------|-------------------|
| O1 | O1(#L) – O4(#L) | O4(#L) – O6(#L) | –               | –      | dimer             |
| O2 | O2(#L) – O5(#L) | O4(#L) – O6(#L) | O2(#L) – O5(#L) | –      | triangular        |
| O3 | O3(#L) – O4(#D) | O3(#D) – O4(#D) | O5(#D) – O3(#L) | –      | triangular        |
| O3 | O3(#L) – O4(#D) | O5(#D) – O3(#L) | O3(#L) – O2(#L) | –      | triangular        |
| O4 | O4(#L) – O6(#L) | O1(#L) – O4(#L) | –               | –      | dimer             |
| O5 | O5(#L) – O3(#D) | O3(#D) – O4(#L) | O3(#L) – O4(#L) | –      | triangular        |
| O6 | –               | –               | –               | –      | –                 |

Table S8 Hydrogen-bond pairs forming the Interaction frames in D-psicose.

|    | Step 1  | Step 2  | Step 3  | Step 4  | Interaction frame |
|----|---------|---------|---------|---------|-------------------|
| O1 | O1 – O6 | O5 – O3 | O4 – O1 | –       | triangle          |
| O1 | O1 – O6 | O1 – O6 | O5 – O3 | O5 – O3 | square            |
| O1 | O1 – O6 | O2 – O4 | O2 – O4 | O5 – O3 | square            |
| O2 | O2 – O4 | O2 – O4 | O4 – O1 | –       | triangular        |
| O2 | O2 – O4 | O4 – O1 | O2 – O4 | –       | triangular        |
| O3 | O3 – O2 | O2 – O4 | O4 – O1 | O1 – O6 | square            |
| O3 | O3 – O2 | O4 – O1 | O2 – O4 | O1 – O6 | square            |
| O4 | O4 – O1 | O1 – O6 | O5 – O3 | –       | triangular        |
| O4 | O4 – O1 | O2 – O4 | O2 – O4 | –       | triangular        |
| O5 | O5 – O3 | O3 – O1 | O1 – O6 | –       | triangular        |
| O6 | –       | –       | –       | –       | –                 |

Table S9 Hydrogen-bond pairs forming the Interaction frames in D,L-psicose, centered on the D molecule.

|    | Step 1          | Step 2          | Step 3          | Step 4 | Interaction frame |
|----|-----------------|-----------------|-----------------|--------|-------------------|
| O1 | O1(#D) – O3(#L) | O4(#L) – O6(#D) | –               | –      | dimer             |
| O2 | O2(#D) – O4(#L) | O4(#L) – O6(#D) | O3(#D) – O2(#D) | –      | triangular        |
| O3 | O3(#D) – O2(#D) | O2(#D) – O4(#L) | O4(#L) – O6(#D) | –      | triangular        |
| O4 | O4(#D) – O6(#L) | O1(#L) – O3(#D) | –               | –      | dimer             |
| O5 | –               | –               | –               | –      | –                 |
| O6 | –               | –               | –               | –      | –                 |

Table S10 Hydrogen-bond pairs forming the Interaction frames in D-tagatose.

|    | Step 1  | Step 2  | Step 3  | Step 4 | Interaction frame |
|----|---------|---------|---------|--------|-------------------|
| O1 | O1 – O5 | O4 – O6 | O5 – O2 | –      | triangular        |
| O1 | O1 – O5 | O5 – O2 | O4 – O6 | –      | triangular        |
| O2 | O2 – O5 | O4 – O6 | O2 – O5 | –      | triangular        |
| O2 | O2 – O5 | O2 – O5 | O4 – O6 | –      | triangular        |
| O3 | O3 – O4 | O3 – O4 | O5 – O2 | –      | triangular        |
| O3 | O3 – O4 | O5 – O2 | O3 – O4 | –      | triangular        |
| O4 | O4 – O6 | O1 – O5 | O5 – O2 | –      | triangular        |
| O4 | O4 – O6 | O2 – O5 | O2 – O5 | –      | triangular        |
| O4 | O4 – O6 | O5 – O2 | O1 – O5 | –      | triangular        |
| O5 | O5 – O2 | O1 – O5 | O4 – O6 | –      | triangular        |
| O5 | O5 – O2 | O3 – O4 | O3 – O4 | –      | triangular        |
| O5 | O5 – O2 | O4 – O6 | O1 – O5 | –      | triangular        |
| O6 | –       | –       | –       | –      | –                 |

Table S11 Hydrogen-bond pairs forming the Interaction frames in D,L-tagatose, centered on the D molecule.

|    | Step 1          | Step 2          | Step 3          | Step 4          | Interaction frame |
|----|-----------------|-----------------|-----------------|-----------------|-------------------|
| O1 | O1(#D) – O4(#D) | O3(#D) – O6(#D) | –               | –               | dimer             |
| O2 | O2(#D) – O3(#L) | O1(#L) – O4(#L) | O4(#L) – O5(#L) | O5(#L) – O1(#D) | square            |
| O2 | O2(#D) – O3(#L) | O5(#L) – O1(#D) | O1(#D) – O4(#D) | O4(#D) – O5(#D) | square            |
| O3 | O3(#D) – O6(#D) | O1(#D) – O4(#D) | –               | –               | dimer             |
| O4 | O4(#D) – O5(#D) | O5(#D) – O1(#L) | O4(#L) – O5(#L) | O5(#L) – O1(#D) | square            |
| O4 | O4(#D) – O5(#D) | O1(#D) – O4(#D) | O1(#D) – O4(#D) | O4(#D) – O5(#D) | square            |
| O5 | O5(#D) – O1(#L) | O1(#L) – O4(#L) | O4(#L) – O5(#L) | O2(#L) – O3(#D) | square            |
| O5 | O5(#D) – O1(#L) | O2(#L) – O3(#D) | O1(#D) – O4(#D) | O4(#D) – O5(#D) | square            |
| O6 | –               | –               | –               | –               | –                 |

Table S12 Donor-type intermolecular hydrogen bonds in D,L-tagatose, D,L-sorbose, D,L-fructose, and D,L-psicose: experimental bond distances (Å), hydrogen bond angles (°), and calculated Bond Overlap Populations (BOP).

| Compound         | D-H...A                 | D-H (Å) | H...A (Å) | D...A (Å) | D-H...A (°) | BOP (electrons) |
|------------------|-------------------------|---------|-----------|-----------|-------------|-----------------|
| D,L-tagatose(#L) | O1-H1...O4<br>(#L) (#L) | 0.820   | 1.99      | 2.78      | 163.4       | 0.0290          |
|                  | O2-H2...O3<br>(#L) (#D) | 0.820   | 1.91      | 2.70      | 163.0       | 0.0323          |
|                  | O3-H3...O6<br>(#L) (#L) | 0.820   | 1.89      | 2.69      | 163.1       | 0.0351          |
|                  | O4-H4...O5<br>(#L) (#L) | 0.820   | 1.91      | 2.73      | 176.4       | 0.0354          |
|                  | O5-H5...O1<br>(#L) (#D) | 0.820   | 1.91      | 2.71      | 162.9       | 0.0341          |
|                  | O1-H1...O4<br>(#D) (#D) | 0.820   | 1.99      | 2.78      | 163.4       | 0.0300          |
| D,L-tagatose(#D) | O2-H2...O3<br>(#D) (#L) | 0.820   | 1.91      | 2.70      | 163.0       | 0.0327          |
|                  | O3-H3...O6<br>(#D) (#D) | 0.820   | 1.89      | 2.69      | 163.1       | 0.0366          |
|                  | O4-H4...O5<br>(#D) (#D) | 0.820   | 1.91      | 2.73      | 176.4       | 0.0324          |
|                  | O5-H5...O1<br>(#D) (#L) | 0.820   | 1.91      | 2.71      | 162.9       | 0.0399          |
|                  | O1-H1...O4<br>(#L) (#L) | 0.820   | 2.37      | 3.17      | 166.8       | 0.0050          |
|                  | O2-H2...O5<br>(#L) (#L) | 0.820   | 1.96      | 2.76      | 164.4       | 0.0278          |
| D,L-sorbose (#L) | O3-H3...O4<br>(#L) (#D) | 0.820   | 1.99      | 2.81      | 172.3       | 0.0283          |
|                  | O4-H4...O6<br>(#L) (#L) | 0.820   | 2.11      | 2.92      | 170.3       | 0.0199          |
|                  | O5-H5...O3<br>(#L) (#D) | 0.820   | 2.10      | 2.87      | 156.0       | 0.0157          |
|                  | O1-H1...O3<br>(#D) (#D) | 0.820   | 2.14      | 2.92      | 158.5       | 0.0185          |
|                  | O2-H2...O5<br>(#D) (#D) | 0.820   | 2.01      | 2.81      | 169.3       | 0.0241          |
|                  | O3-H3...O4<br>(#D) (#D) | 0.820   | 1.93      | 2.75      | 172.0       | 0.0315          |
| D,L-sorbose (#D) | O4-H4...O6<br>(#D) (#D) | 0.820   | 2.25      | 3.05      | 165.4       | 0.0119          |

|                         |                         |                         |       |      |       |        |
|-------------------------|-------------------------|-------------------------|-------|------|-------|--------|
|                         | O5-H5...O3<br>(#D) (#L) | 0.820                   | 2.29  | 3.06 | 157.9 | 0.0095 |
| D,L-<br>fructose(#L)    | O1-H1...O3<br>(#L) (#L) | 0.820                   | 2.28  | 2.92 | 135.0 | 0.0074 |
|                         | O2-H2...O1<br>(#L) (#D) | 0.820                   | 1.93  | 2.72 | 161.0 | 0.0295 |
|                         | O3-H3...O4<br>(#L) (#D) | 0.820                   | 1.96  | 2.78 | 177.2 | 0.0317 |
|                         | O4-H4...O5<br>(#L) (#L) | 0.820                   | 2.01  | 2.79 | 158.4 | 0.0215 |
|                         | O5-H5...O4<br>(#L) (#D) | 0.820                   | 2.05  | 2.84 | 162.5 | 0.0206 |
|                         | D,L-<br>fructose(#D)    | O1-H1...O3<br>(#D) (#D) | 0.820 | 2.28 | 2.92  | 135.0  |
| O2-H2...O1<br>(#D) (#L) |                         | 0.820                   | 1.93  | 2.72 | 161.0 | 0.283  |
| O3-H3...O4<br>(#D) (#L) |                         | 0.820                   | 1.96  | 2.78 | 177.3 | 0.0321 |
| O4-H4...O5<br>(#D) (#D) |                         | 0.820                   | 2.01  | 2.79 | 158.4 | 0.0243 |
| O5-H5...O4<br>(#D) (#L) |                         | 0.820                   | 2.05  | 2.84 | 162.5 | 0.0238 |
| D,L-<br>psicose(#L)     |                         | O1-H1...O3<br>(#L) (#D) | 0.820 | 1.91 | 2.72  | 168.2  |
|                         | O2-H2...O4<br>(#L) (#D) | 0.820                   | 1.92  | 2.72 | 166.1 | 0.0334 |
|                         | O3-H3...O2<br>(#L) (#L) | 0.820                   | 2.20  | 2.87 | 140.4 | 0.0102 |
|                         | O4-H4...O6<br>(#L) (#D) | 0.820                   | 2.14  | 2.83 | 141.0 | 0.0140 |
|                         | O5-H5...O1<br>(#L) (#D) | 0.820                   | 1.94  | 2.75 | 169.0 | 0.0284 |
|                         | D,L-<br>psicose(#D)     | O1-H1...O3<br>(#D) (#L) | 0.820 | 1.91 | 2.72  | 168.2  |
| O2-H2...O4<br>(#D) (#L) |                         | 0.820                   | 1.92  | 2.72 | 166.1 | 0.0370 |
| O3-H3...O2<br>(#D) (#D) |                         | 0.820                   | 2.20  | 2.87 | 140.4 | 0.0104 |
| O4-H4...O6<br>(#D) (#L) |                         | 0.820                   | 2.14  | 2.83 | 141.0 | 0.0129 |
| O5-H5...O1<br>(#D) (#L) |                         | 0.820                   | 1.94  | 2.75 | 169.0 | 0.0312 |

Table S13 Donor-type intermolecular hydrogen bonds in D-tagatose, L-sorbose, D-fructose, and D-psicose: experimental bond distances (Å), hydrogen bond angles (°), and calculated Bond Overlap Populations (BOP).

| Compound       | D-H...A    | D-H (Å) | H...A (Å) | D...A (Å) | D-H...A (°) | BOP (electrons) |
|----------------|------------|---------|-----------|-----------|-------------|-----------------|
| D-tagatose     | O1-H1...O5 | 0.829   | 2.09      | 2.79      | 141.6       | 0.0191          |
|                | O2-H2...O5 | 0.805   | 2.10      | 2.85      | 154.8       | 0.0205          |
|                | O3-H3...O4 | 0.826   | 1.90      | 2.72      | 172.6       | 0.0358          |
|                | O4-H4...O6 | 0.810   | 1.96      | 2.77      | 175.1       | 0.0328          |
|                | O5-H5...O2 | 0.810   | 2.02      | 2.82      | 170.7       | 0.0260          |
| D-tagatose (2) | O1-H1...O5 | 0.829   | 2.09      | 2.79      | 141.6       | 0.0184          |
|                | O2-H2...O5 | 0.805   | 2.10      | 2.85      | 154.8       | 0.0183          |
|                | O3-H3...O4 | 0.826   | 1.90      | 2.72      | 172.6       | 0.0408          |
|                | O4-H4...O6 | 0.810   | 1.96      | 2.77      | 175.1       | 0.0353          |
|                | O5-H5...O2 | 0.810   | 2.02      | 2.82      | 170.7       | 0.0245          |
| L-sorbose      | O1-H1...O3 | 0.917   | 1.87      | 2.77      | 166.8       | 0.0363          |
|                | O2-H2...O5 | 0.968   | 1.88      | 2.80      | 157.2       | 0.0427          |
|                | O3-H3...O4 | 0.974   | 1.75      | 2.72      | 175.7       | 0.0605          |
|                | O4-H4...O6 | 0.941   | 1.93      | 2.86      | 168.4       | 0.0409          |
|                | O5-H5...O2 | 0.962   | 1.95      | 2.89      | 162.8       | 0.0367          |
|                | O5-H5...O3 | 0.962   | 2.58      | 3.18      | 120.4       | 0.0420          |
| L-sorbose (2)  | O1-H1...O3 | 0.917   | 1.87      | 2.77      | 166.8       | 0.0411          |
|                | O2-H2...O5 | 0.968   | 1.88      | 2.80      | 157.2       | 0.0606          |
|                | O3-H3...O4 | 0.974   | 1.75      | 2.72      | 175.7       | 0.0394          |
|                | O4-H4...O6 | 0.941   | 1.93      | 2.86      | 168.4       | 0.0350          |
|                | O5-H5...O2 | 0.962   | 1.95      | 2.89      | 162.8       | 0.0363          |
|                | O5-H5...O3 | 0.962   | 2.58      | 3.18      | 120.4       | 0.0427          |
| D-fructose     | O1-H1...O3 | 0.825   | 2.03      | 2.81      | 156.1       | 0.0220          |
|                | O2-H2...O1 | 0.875   | 1.81      | 2.65      | 159.7       | 0.0469          |
|                | O3-H3...O5 | 0.812   | 2.09      | 2.89      | 172.1       | 0.0223          |
|                | O4-H4...O2 | 0.817   | 2.14      | 2.93      | 161.8       | 0.0153          |
|                | O5-H5...O2 | 0.847   | 1.94      | 2.78      | 168.2       | 0.0262          |
| D-fructose (2) | O1-H1...O3 | 0.825   | 2.03      | 2.81      | 156.1       | 0.0261          |
|                | O2-H2...O1 | 0.875   | 1.81      | 2.65      | 159.7       | 0.0425          |
|                | O3-H3...O5 | 0.812   | 2.09      | 2.89      | 172.1       | 0.0203          |
|                | O4-H4...O2 | 0.817   | 2.14      | 2.93      | 161.8       | 0.0159          |
|                | O5-H5...O2 | 0.847   | 1.94      | 2.78      | 168.2       | 0.0304          |
| D-psicose      | O1-H1...O6 | 0.743   | 2.03      | 2.75      | 160.5       | 0.0222          |
|                | O2-H2...O4 | 0.807   | 1.95      | 2.73      | 162.8       | 0.0273          |
|                | O3-H3...O5 | 0.735   | 2.64      | 3.15      | 128.0       | 0.0154          |
|                | O4-H4...O1 | 0.685   | 2.06      | 2.74      | 171.5       | 0.0179          |
|                | O5-H5...O3 | 0.839   | 2.04      | 2.87      | 173.5       | 0.0234          |

|                  |            |       |      |      |       |        |
|------------------|------------|-------|------|------|-------|--------|
| D-psicose<br>(2) | O1-H1...O6 | 0.743 | 2.03 | 2.75 | 160.5 | 0.0228 |
|                  | O2-H2...O4 | 0.807 | 1.95 | 2.73 | 162.8 | 0.0283 |
|                  | O3-H3...O2 | 0.735 | 2.64 | 3.15 | 128.0 | 0.0169 |
|                  | O4-H4...O1 | 0.685 | 2.06 | 2.74 | 171.5 | 0.0208 |
|                  | O5-H5...O3 | 0.839 | 2.04 | 2.87 | 173.5 | 0.0241 |

Table S14 Contribution ratios of intermolecular interactions in racemic ketohexoses.

| Compound         | H...O(donor)[%] | H...H[%] | O...H(Acceptor)[%] | O...O[%] | all...all[%] |
|------------------|-----------------|----------|--------------------|----------|--------------|
| D,L-fructose(#L) | 21.6            | 54.0     | 24.2               | 0.2      | 100          |
| D,L-fructose(#D) | 21.6            | 54.0     | 24.2               | 0.2      | 100          |
| D,L-psicose(#L)  | 20.1            | 55.9     | 23.9               | 0.1      | 100          |
| D,L-psicose(#D)  | 20.1            | 55.9     | 23.9               | 0.1      | 100          |
| D,L-tagatose(#L) | 19.1            | 58.0     | 22.7               | 0.2      | 100          |
| D,L-tagatose(#D) | 19.0            | 58.0     | 22.8               | 0.2      | 100          |
| D,L-sorbose(#L)  | 22.1            | 51.6     | 25.7               | 0.6      | 100          |
| D,L-sorbose(#D)  | 22.1            | 51.6     | 25.7               | 0.6      | 100          |

Table S15 Contribution ratios of intermolecular interactions in chiral ketohexoses.

| Compound   | H...O(donor)[%] | H...H[%] | O...H(Acceptor)[%] | O...O[%] | all...all[%] |
|------------|-----------------|----------|--------------------|----------|--------------|
| D-fructose | 21.6            | 53.0     | 25.4               | 0.0      | 100          |
| D-psicose  | 20.4            | 56.7     | 22.8               | 0.1      | 100          |
| D-tagatose | 21.5            | 53.2     | 25.3               | 0.0      | 100          |
| L-sorbose  | 21.1            | 53.4     | 24.4               | 1.1      | 100          |

Table S16 FIMs analysis results for D,L-tagatose. Ideal hydrogen-bonding pairs are shown in black, while non-ideal hydrogen-bonding pairs are shown in red.

| compound          | Hydrogen bond pairs |           |
|-------------------|---------------------|-----------|
|                   | Donor               | Acceptor  |
| D,L-tagatose (#L) | O1-O4               | O4-O1     |
|                   | (#L) (#L)           | (#L) (#L) |
|                   | O2-O3               | O3-O2     |
|                   | (#L) (#D)           | (#D) (#L) |
|                   | O3-O6               | O6-O3     |
|                   | (#L) (#L)           | (#L) (#L) |
|                   | O4-O5               | O5-O4     |
|                   | (#L) (#L)           | (#L) (#L) |
| D,L-tagatose (#D) | O5-O1               | O1-O5     |
|                   | (#L) (#D)           | (#D) (#L) |
|                   | O1-O4               | O4-O1     |
|                   | (#D) (#D)           | (#D) (#D) |
|                   | O2-O3               | O3-O2     |
|                   | (#D) (#L)           | (#L) (#D) |
|                   | O3-O6               | O6-O3     |
|                   | (#D) (#D)           | (#D) (#D) |
| D,L-tagatose (#D) | O4-O5               | O5-O4     |
|                   | (#D) (#D)           | (#D) (#D) |
|                   | O5-O1               | O1-O5     |
|                   | (#D) (#L)           | (#L) (#D) |

Table S17 FIMs analysis results for D,L-sorbose. Ideal hydrogen-bonding pairs are shown in black, while non-ideal hydrogen-bonding pairs are shown in red.

| compound         | Hydrogen bond pairs |           |
|------------------|---------------------|-----------|
|                  | Donor               | Acceptor  |
| D,L-sorbose (#L) | O1-O4               | O4-O1     |
|                  | (#L) (#L)           | (#L) (#L) |
|                  | O2-O5               | O5-O2     |
|                  | (#L) (#L)           | (#L) (#L) |
|                  | O3-O4               | O4-O3     |
|                  | (#L) (#D)           | (#D) (#L) |
|                  | O4-O6               | O6-O4     |
|                  | (#L) (#L)           | (#L) (#L) |
|                  | O5-O2               | O2-O5     |
|                  | (#L) (#D)           | (#D) (#L) |
| D,L-sorbose (#D) | O5-O3               | O3-O5     |
|                  | (#L) (#D)           | (#D) (#L) |
|                  | O1-O3               | O3-O1     |
|                  | (#D) (#D)           | (#D) (#D) |
|                  | O1-O4               | O4-O1     |
|                  | (#D) (#D)           | (#D) (#D) |
|                  | O2-O5               | O5-O2     |
|                  | (#D) (#D)           | (#D) (#D) |
|                  | O3-O4               | O4-O3     |
|                  | (#D) (#D)           | (#D) (#D) |
| O4-O1            | O1-O4               |           |
| (#D) (#D)        | (#D) (#D)           |           |
| O4-O6            | O6-O4               |           |
| (#D) (#D)        | (#D) (#D)           |           |
| O5-O2            | O2-O5               |           |
| (#D) (#L)        | (#L) (#D)           |           |
| O5-O3            | O3-O5               |           |
| (#D) (#L)        | (#L) (#D)           |           |

Table S18 FIMs analysis results for D,L-fructose. Ideal hydrogen-bonding pairs are shown in black, while non-ideal hydrogen-bonding pairs are shown in red.

| compound          | Hydrogen bond pairs |           |
|-------------------|---------------------|-----------|
|                   | Donor               | Acceptor  |
| D,L-fructose (#L) | O1-O2               | O2-O1     |
|                   | (#L) (#L)           | (#L) (#L) |
|                   | O1-O3               | O3-O1     |
|                   | (#L) (#L)           | (#L) (#L) |
|                   | O2-O1               | O1-O2     |
|                   | (#L) (#D)           | (#D) (#L) |
|                   | O3-O4               | O4-O3     |
|                   | (#L) (#D)           | (#D) (#L) |
|                   | O4-O5               | O5-O4     |
|                   | (#L) (#L)           | (#L) (#L) |
| D,L-fructose (#D) | O5-O4               | O4-O5     |
|                   | (#L) (#D)           | (#D) (#L) |
|                   | O1-O2               | O2-O1     |
|                   | (#D) (#D)           | (#D) (#D) |
|                   | O1-O3               | O3-O1     |
|                   | (#D) (#D)           | (#D) (#D) |
|                   | O2-O1               | O1-O2     |
|                   | (#D) (#L)           | (#L) (#D) |
|                   | O3-O4               | O4-O3     |
|                   | (#D) (#L)           | (#L) (#D) |
| O4-O5             | O5-O4               |           |
| (#D) (#D)         | (#D) (#D)           |           |
| O5-O4             | O4-O5               |           |
| (#D) (#L)         | (#L) (#D)           |           |

Table S19 FIMs analysis results for D,L-psicose. Ideal hydrogen-bonding pairs are shown in black, while non-ideal hydrogen-bonding pairs are shown in red.

| compound         | Hydrogen bond pairs |           |
|------------------|---------------------|-----------|
|                  | Donor               | Acceptor  |
| D,L-psicose (#L) | O1-O3               | O3-O1     |
|                  | (#L) (#D)           | (#D) (#L) |
|                  | O2-O4               | O4-O2     |
|                  | (#L) (#D)           | (#D) (#L) |
|                  | O3-O2               | O2-O3     |
|                  | (#L) (#L)           | (#L) (#L) |
|                  | O4-O6               | O6-O4     |
|                  | (#L) (#D)           | (#D) (#L) |
| D,L-psicose (#D) | O5-O1               | O1-O5     |
|                  | (#L) (#D)           | (#D) (#L) |
|                  | O1-O3               | O3-O1     |
|                  | (#D) (#L)           | (#L) (#D) |
|                  | O2-O4               | O4-O2     |
|                  | (#D) (#L)           | (#L) (#D) |
|                  | O3-O2               | O2-O3     |
|                  | (#D) (#D)           | (#D) (#D) |
| D,L-psicose (#L) | O4-O6               | O6-O4     |
|                  | (#D) (#L)           | (#L) (#D) |
|                  | O5-O1               | O1-O5     |
|                  | (#D) (#L)           | (#L) (#D) |

Table S20 FIMs analysis results for D-tagatose. Ideal hydrogen-bonding pairs are shown in black, while non-ideal hydrogen-bonding pairs are shown in red.

| compound   | Hydrogen bond pairs |          |
|------------|---------------------|----------|
|            | Donor               | Acceptor |
| D-tagatose | O1-O5               | O5-O1    |
|            | O2-O5               | O5-O2    |
|            | O3-O4               | O4-O3    |
|            | O4-O6               | O6-O4    |
|            | O5-O2               | O2-O5    |

Table S21 FIMs analysis results for L-sorbose. Ideal hydrogen-bonding pairs are shown in black, while non-ideal hydrogen-bonding pairs are shown in red.

| compound  | Hydrogen bond pairs |          |
|-----------|---------------------|----------|
|           | Donor               | Acceptor |
| L-sorbose | O1-O3               | O3-O1    |
|           | O2-O5               | O5-O2    |
|           | O3-O4               | O4-O3    |
|           | O4-O6               | O6-O4    |
|           | O5-O2               | O2-O5    |
|           | O5-O3               | O3-O5    |

Table S22 FIMs analysis results for D-fructose. Ideal hydrogen-bonding pairs are shown in black, while non-ideal hydrogen-bonding pairs are shown in red.

| compound   | Hydrogen bond pairs |          |
|------------|---------------------|----------|
|            | Donor               | Acceptor |
| D-fructose | O1-O3               | O3-O1    |
|            | O2-O1               | O1-O2    |
|            | O3-O5               | O5-O3    |
|            | O3-O6               | O6-O3    |
|            | O4-O2               | O2-O4    |
|            | O5-O2               | O2-O5    |

Table S23 FIMs analysis results for D-psicose. Ideal hydrogen-bonding pairs are shown in black, while non-ideal hydrogen-bonding pairs are shown in red.

| compound  | Hydrogen bond pairs |          |
|-----------|---------------------|----------|
|           | Donor               | Acceptor |
| D-psicose | O1-O6               | O6-O1    |
|           | O2-O4               | O4-O2    |
|           | O3-O2               | O2-O3    |
|           | O4-O1               | O1-O4    |
|           | O5-O3               | O3-O5    |
